# Supplementary material
Source: PubMed Central journal article supplement (PMC7375973)
Supplement: mmc1.pdf [file mmc1.pdf]

Supplementary Material  
Mutations strengthened SARS-CoV-2 infectivity

Jiahui Chen<sup>1</sup>, Rui Wang<sup>1</sup>, Menglun Wang<sup>1</sup>, and Guo-Wei Wei<sup>1,2,3\*</sup>

<sup>1</sup> Department of Mathematics,

Michigan State University, MI 48824, USA.

<sup>2</sup> Department of Electrical and Computer Engineering,

Michigan State University, MI 48824, USA.

<sup>3</sup> Department of Biochemistry and Molecular Biology,

Michigan State University, MI 48824, USA.

July 31, 2020

---

\*Corresponding author. Email: [wei@math.msu.edu](mailto:wei@math.msu.edu)

# Contents

|                                                                                                         |          |
|---------------------------------------------------------------------------------------------------------|----------|
| <b>S1 TopNetTree model for protein-protein interaction (PPI) binding affinity changes upon mutation</b> | <b>1</b> |
| S1.1 Topology-based feature generation of PPIs . . . . .                                                | 1        |
| S1.2 Machine learning models . . . . .                                                                  | 4        |
| S1.3 Cross-validation of TopNetTree . . . . .                                                           | 4        |
| <b>S2 Supplementary Tables</b>                                                                          | <b>5</b> |
| S2.1 Six clusters of SARS-CoV-2 mutations on the RBD and predicted BA changes . . . . .                 | 5        |
| S2.2 Predicted BA changes for most likely, likely, and unlikely future mutations . . . . .              | 9        |
| S2.3 Predicted BA changes for all mutations from SARS-CoV to SARS-CoV-2. . . . .                        | 46       |

## S1 TopNetTree model for protein-protein interaction (PPI) binding affinity changes upon mutation

The topology-based network tree (TopNetTree) was constructed by an innovative integration between the topological representation and NetTree for predicting protein-protein interaction binding affinity changes following mutation  $\Delta\Delta G$  [7]. In this work, TopNetTree is applied to predict the binding affinity changes of mutations that happened on the RBD with ACE2 of SARS-CoV-2 after January 5, 2020. As shown in Figure S1, topology-based feature generation is the first step followed by a convolutional neural network (CNN)-assisted model. The topological representation uses element- and site-specific persistent homology to simplify the structural complexity of protein-protein complexes and encode vital biological information into topological invariants. NetTree is a recently developed deep learning algorithm that integrates the advantages of convolutional neural networks and gradient-boosting trees (GBT) [7]. In this section, we briefly describe the topology representation for machine learning training and prediction. Details can be found in the literature [7].

### S1.1 Topology-based feature generation of PPIs

The topology-based feature generation is built upon from persistence homology starting with simplicial complex and filtration [2]. As a type of algebraic topology, persistence homology studies simplicial complex on discrete datasets under various settings. Among the many constructions, two that are widely used for point clouds are the Vietoris-Rips (VR) complex and alpha complex [3] which are applied in our approach. Built upon a simplicial complex, the topological invariants of a point-cloud dataset can be identified, such as the set of atoms in protein-protein interactions. Meanwhile, topological invariants (separated components, rings, and cavities) can be enumerated by counting the numbers referred to as Betti-0, Betti-1, and Betti-2, respectively. Thus taxing and uninformative features or calculations are fully abandoned, whereas geometric and topological characteristics persevere as data representation. Moreover, using persistent homology, the original 3D point-cloud data are characterized by topological barcodes that record the “birth” and “death” of each topological invariants and simplifying complicated structural representations of a PPI-complex. Although topology data presentation much simplifies the problem in many directions, better construction is required for it to extract patterns of different biological or chemical aspects. Before describing about more detailed feature generations, we first preset the constructions for a PPI complex into various subsets.

1.  $\mathcal{A}_m$ : atoms of the mutation sites.
2.  $\mathcal{A}_{mn}(r)$ : atoms in the neighbourhood of the mutation site within a cut-off distance  $r$ .
3.  $\mathcal{A}_{Ab}(r)$ : antibody atoms within  $r$  of the binding site.

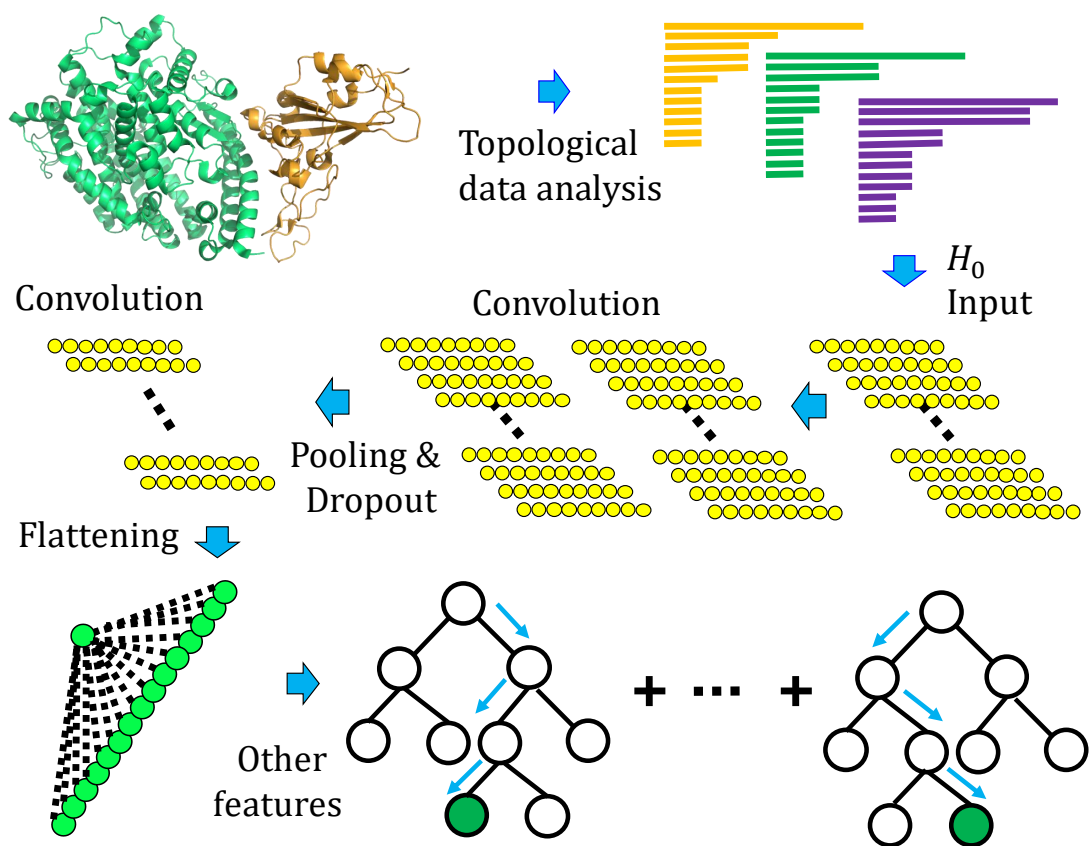

Figure S1: An illustration of the TopNetTree model. Protein structure shown in the plot is SARS-CoV-2 spike receptor-binding domain bound with ACE2 (PDB 6M0J). Here,  $H_0$  are the 0-dimensional topological input features for machine learning model.

4.  $\mathcal{A}_{\text{Ag}}(r)$ : antigen atoms within  $r$  of the binding site.
5.  $\mathcal{A}_{\text{ele}}(\text{E})$ : atoms in the system that has atoms of element type E. The distance matrix is specially designed such that it excludes the interactions between the atoms from the same set. For interactions between atoms  $a_i$  and  $a_j$  in set  $\mathcal{A}$  and/or set  $\mathcal{B}$ , the modified distance is defined as

$$D_{\text{mod}}(a_i, a_j) = \begin{cases} \infty, & \text{if } a_i, a_j \in \mathcal{A}, \text{ or } a_i, a_j \in \mathcal{B}, \\ D_e(a_i, a_j), & \text{if } a_i \in \mathcal{A} \text{ and } a_j \in \mathcal{B}, \end{cases} \quad (1)$$

where  $D_e(a_i, a_j)$  is the Euclidian distance between  $a_i$  and  $a_j$ .

In algebraic topology, molecular atoms can be treated as points presented by  $v_0, v_1, v_2, \dots, v_k$  as  $k+1$  affinely independent points. Simplicial complex, the essential building blocks, is a finite collection of sets of points  $K = \{\sigma_i\}$ , and  $\sigma_i$  are called linear combinations of these points in  $\mathbb{R}^n$  ( $n \geq k$ ). For instance, a 0-, 1-, 2-, or 3-simplex in geometry representation is a vertex, an edge, a triangle, or a tetrahedron, respectively. A simplicial complex  $K$  is valid if a face  $\tau$  of a  $k$ -simplex  $\sigma_i$  of  $K$  is also in  $K$ , such that  $\tau \subseteq \sigma_i$  and  $\sigma_i \in K$  imply  $\tau \in K$  and the non-empty intersection of any two simplexes is a face for both. Given a simplicial complex  $K$ , a  $k$ -chain is a finite formal sum of  $k$ -simplices; that is,  $\sum_i \alpha_i \sigma_i^k$ . The set of all  $k$ -chains of the simplicial complex  $K$  equipped with an algebraic field (typically,  $\mathbb{Z}_2$ ) forms an abelian group  $C_k(K, \mathbb{Z}_2)$ , which means the coefficients  $a_i$  are chosen from  $\mathbb{Z}_2$ . A boundary operator  $\partial_k : C_k \rightarrow C_{k-1}$  for a  $k$ -simplex  $\sigma^k = \{v_0, v_1, v_2, \dots, v_k\}$  are homomorphisms defined as  $\partial_k \sigma^k = \sum_{i=0}^k (-1)^i \{v_0, v_1, \dots, \hat{v}_i, \dots, v_k\}$ , where  $\{v_0, v_1, \dots, \hat{v}_i, \dots, v_k\}$  is a  $(k-1)$ -simplex excluding  $v_i$  from the vertex set. Consequently, an important property of boundary operator,  $\partial_{k-1} \partial_k = \emptyset$ , follows from that boundaries are boundaryless. Moreover the  $k$ th cycle group  $Z_k = \ker \partial_k = \{c \in C_k \mid \partial_k c = \emptyset\}$  is defined to be the kernel of  $\partial_k$ , whose elements are called  $k$ -cycles; and the  $k$ th boundary group is the image of  $\partial_{k+1}$  denoted as  $B_k = \text{im } \partial_{k+1} = \{\partial_{k+1} c \mid c \in C_{k+1}\}$ . The algebraic construction to connect a sequence of complexes by boundary maps is called a chain complex

$$\dots \xrightarrow{\partial_{i+1}} C_i(X) \xrightarrow{\partial_i} C_{i-1}(X) \xrightarrow{\partial_{i-1}} \dots \xrightarrow{\partial_2} C_1(X) \xrightarrow{\partial_1} C_0(X) \xrightarrow{\partial_0} 0$$

and the  $k$ th homology group is the quotient group defined by

$$H_k = Z_k / B_k. \quad (2)$$

The key property of boundary operators implies  $B_k \subseteq Z_k \subseteq C_k$ . The Betti numbers are defined by the ranks of  $k$ th homology group  $H_k$  which counts  $k$ -dimensional holes, especially,  $\beta_0 = \text{rank}(H_0)$  reflects the number of connected components,  $\beta_1 = \text{rank}(H_1)$  reflects the number of loops, and  $\beta_2 = \text{rank}(H_2)$  reveals the number of voids or cavities. Together, the set of Betti numbers  $\{\beta_0, \beta_1, \beta_2, \dots\}$  indicates the intrinsic topological property of a system.

Persistent homology is devised to track the multiscale topological information over different scales along a filtration [3]. A filtration of a topology space  $K$  is a nested sequence of subspaces  $\{K^t\}_{t=0, \dots, m}$  of  $K$  such that  $\emptyset = K^0 \subseteq K^1 \subseteq K^2 \subseteq \dots \subseteq K^m = K$ . Moreover, on this complex sequence, we obtain a sequence of chain complexes by homomorphisms:  $C_*(K^0) \rightarrow C_*(K^1) \rightarrow \dots \rightarrow C_*(K^m)$  and a homology sequence:  $H_*(K^0) \rightarrow H_*(K^1) \rightarrow \dots \rightarrow H_*(K^m)$ , correspondingly. The  $p$ -persistent  $k$ th homology group of  $K^t$  is defined as  $H_k^{t,p} = Z_k^t / (B_k^{t+p} \cap Z_k^t)$ , where  $B_k^{t+p} = \text{im } \partial_{k+1}(K^{t+p})$ . Intuitively, this homology group records the homology classes of  $K^t$  that are persistent at least until  $K^{t+p}$ . Under the filtration process, the persistent homology barcodes can be generated. Then the feature vectors can be constructed from these sets of intervals for machine learning models.

In a variety of vectorization methods, one discretizes the filtration parameter interval into bins and model the behavior of the barcodes in each bin [1]. To make use of advanced machine learning algorithms, we subdivide a filtration interval into bins of length. Then the numbers of persistence intervals are counted for each bin, such that birth events and death events can be represented. This approach gives us three feature

vectors for each topological barcode for the machine learning method. Note for different discretizations, the characterization of birth and death might not be stable so that only Betti-0 ( $H_0$ ) barcodes obtained from the VR filtration are applied in this approach. Intuitively, features generated by binned barcode vectorization can reflect the strength of atom bonds, van der Waals interactions, and can be easily incorporated into a CNN, which captures and discriminates local patterns. Another method of vectorization is to get the statistics of bar lengths, birth values, and death values, such as sum, maximum, minimum, mean, and standard derivation. This method is applied to vectorize Betti-1 ( $H_1$ ) and Betti-2 ( $H_2$ ) barcodes obtained from alpha complex filtration based on the facts that higher-dimensional barcodes are sparser than  $H_0$  barcodes.

## S1.2 Machine learning models

Accurate prediction of binding affinity changes following mutation for PPIs is very challenging due to the complex dataset and 3D structures. A hybrid machine learning algorithm that integrates a CNN and GBT is designed to overcome difficulties. Briefly speaking, partial topologically simplified descriptions, specifically vectorized  $H_0$  barcode feature, are converted into concise features by the CNN module. Then a GBT module is trained on the whole feature set for a robust predictor with effective control of overfitting.

**TopGBT model.** The gradient boosting tree (GBT) method produces a prediction model as an ensemble method which is a class of machine learning algorithms. It builds a popular module for regression and classification problems from weak learners. By the assumption that the individual learners are likely to make different mistakes, the method using a summation of the weak learners to eliminate the overall error. Furthermore, a decision tree is added to the ensemble depending on the current prediction error on the training dataset. Therefore, this method (a topology-based GBT or TopGBT) is relatively robust against hyperparameter tuning and overfitting, especially for a moderate number of features. The GBT is shown for its robustness against overfitting, good performance for moderately small data sizes, and model interpretability. The current work uses the package provided by scikit-learn (v 0.23.0) [5].

**TopCNN model.** CNN is a class of deep neural networks and is considered as some of the most successful architectures. CNN is a regularized case of a multilayer connected neural network, such that each neuron is connected locally to neurons in the next convolution layers and the weights are shared across different locations. To prepare the integration of CNN and GBT, CNN is treated as an intermediate model that converts vectorized  $H_0$  topological features into a higher-level abstract feature for the downstream GBT model.

**TopNetTree model.** A supervised CNN model with the PPI  $\Delta\Delta G$  as labels is trained for extracting high-level features from  $H_0$  barcodes. Once the model is set up, the flatten layer neural outputs of CNN are feed into a GBT model to rank their importance. Based on the importance, and ordered subset of CNN-trained features is combined with features constructed from high-dimensional topological barcodes,  $H_1$  and  $H_2$  into the final GBT model as shown in Fig. S1. As for the parameters of the GBT model, 10 times 10-fold experiments are done for searching the optimal parameter setting.

## S1.3 Cross-validation of TopNetTree

The proposed TopNetTree method is trained on the SKEMPI 2.0 dataset [4], which has 4,169 variants in 319 different complexes. A set ‘‘S8338’’ with 8,338 variants was derived from SKEMPI 2.0 dataset by setting the reverse mutation energy changes to the negative values of its original energy changes. To address the reliability of the TopNetTree method, we did the tenfold cross-validation on the SKEMPI 2.0 dataset with the averaged training accuracy, Pearson correlation coefficients  $R_p$ , Kendall’s  $\tau$ , and the root mean square error (RMSE), being 0.98, 0.89, and 0.37 kcal/mol. As shown in Table S1, these metrics are based on the average of ten random splittings of the ten-fold cross-validations which indicate TopNetTree is well trained. The performance test of tenfold cross-validation on dataset gives as  $R_p = 0.84$ ,  $\tau = 0.60$ , and  $RMSE = 1.06$

Table S1: Ten-fold cross-validation of the TopNetTree on the SKEMPI 2.0 dataset.

|                 | $R_p$ | $\tau$ | RMSE (kcal/mol) |                 | $R_p$ | $\tau$ | RMSE (kcal/mol) |
|-----------------|-------|--------|-----------------|-----------------|-------|--------|-----------------|
| Fold 1 (Train)  | 0.981 | 0.884  | 0.366           | Fold 6 (Train)  | 0.983 | 0.904  | 0.353           |
| Fold 1 (Test)   | 0.835 | 0.595  | 1.065           | Fold 6 (Test)   | 0.836 | 0.594  | 1.064           |
| Fold 2 (Train)  | 0.982 | 0.902  | 0.360           | Fold 7 (Train)  | 0.983 | 0.904  | 0.356           |
| Fold 2 (Test)   | 0.839 | 0.600  | 1.061           | Fold 7 (Test)   | 0.838 | 0.594  | 1.060           |
| Fold 3 (Train)  | 0.982 | 0.887  | 0.366           | Fold 8 (Train)  | 0.979 | 0.878  | 0.392           |
| Fold 3 (Test)   | 0.837 | 0.595  | 1.068           | Fold 8 (Test)   | 0.840 | 0.596  | 1.061           |
| Fold 4 (Train)  | 0.981 | 0.880  | 0.369           | Fold 9 (Train)  | 0.982 | 0.902  | 0.362           |
| Fold 4 (Test)   | 0.841 | 0.596  | 1.059           | Fold 9 (Test)   | 0.838 | 0.596  | 1.069           |
| Fold 5 (Train)  | 0.982 | 0.906  | 0.365           | Fold 10 (Train) | 0.982 | 0.886  | 0.367           |
| Fold 5 (Test)   | 0.839 | 0.594  | 1.062           | Fold 10 (Test)  | 0.835 | 0.596  | 1.064           |
| Average (Train) | 0.982 | 0.893  | 0.366           |                 |       |        |                 |
| Average (Test)  | 0.838 | 0.596  | 1.063           |                 |       |        |                 |

Table S2: Comparison of different methods' performance on S8338

| Cross validation type                          | Method        | $R_p$ | RMSE (kcal/mol) |
|------------------------------------------------|---------------|-------|-----------------|
| Leave one complex and its mutations out        | TopNetTree    | 0.80  | 1.15            |
|                                                | MutaBind2 [8] | 0.74  | 1.37            |
|                                                | mCSM-PPI2 [6] | 0.75  | 1.30            |
| Leave one interface type and its mutations out | TopNetTree    | 0.72  | 1.36            |
|                                                | MutaBind2 [8] | 0.66  | 1.53            |
|                                                | mCSM-PPI2 [6] | 0.67  | 1.39            |

kcal/mol, which is of the same level of accuracy as the best in the literature [7].

Finally, Table S2 illustrates the performance on the bench set S8338. Other methods in the comparison, namely MutaBind2 [8] and mCSM-PPI2 [6], are the-state-of-the-art in the field. There are 319 complexes and 5 types of interfaces in dataset S8338. Two different cross-validation strategies were designed in early work [6, 8]. The first cross validation strategy uses 318 complexes and their mutations as the training set to predict the left complex and its mutations. The second cross validation strategy collects four of five types of complexes and their mutations as the training set. The testing set is the rest type of complexes and mutations. As shown in Table S2, TopNetTree has the best performance among three methods.

## S2 Supplementary Tables

### S2.1 Six clusters of SARS-CoV-2 mutations on the RBD and predicted BA changes

Table S3: Six cluster binding affinity change prediction. Residue ID is according to SARS-CoV-2.

| Cluster | Mutation | Frequency | Binding affinity change (kcal/mol) |
|---------|----------|-----------|------------------------------------|
| I       | G339D    | 1         | 0.038037932371751                  |
| I       | E340K    | 1         | -0.13915060303798316               |
| I       | A344S    | 1         | -0.09148279588881875               |
| I       | T345S    | 1         | 0.037173505187905534               |

Continued on next page

Table S3 – continued from previous page

| Cluster | Mutation | Frequency | Binding affinity change (kcal/mol) |
|---------|----------|-----------|------------------------------------|
| I       | R346K    | 2         | 0.609545129905911                  |
| I       | A348S    | 2         | -0.09604388978281342               |
| I       | N354K    | 3         | 0.35806448022647774                |
| I       | N354S    | 2         | 1.0806328048122054                 |
| I       | D364Y    | 1         | 0.036473001468085235               |
| I       | V367F    | 3         | 1.155442051834433                  |
| I       | V382L    | 1         | -0.4911188069529559                |
| I       | P384L    | 1         | -0.16402580528226846               |
| I       | P384S    | 1         | -0.16736687642169268               |
| I       | T393P    | 1         | -0.047913343538074846              |
| I       | R403K    | 8         | 0.0248089685344706                 |
| I       | D405V    | 1         | 0.11496697449663433                |
| I       | Q414E    | 3         | -0.07626851449790645               |
| I       | Q414P    | 1         | 0.12135308997471861                |
| I       | T415S    | 1         | 0.04852054861421278                |
| I       | I418V    | 1         | 0.1416451396868426                 |
| I       | N439K    | 11        | 1.4272485828790165                 |
| I       | N440K    | 1         | 0.36314255681801116                |
| I       | L441I    | 1         | -0.06747155525566285               |
| I       | K444R    | 1         | 0.6864210980708181                 |
| I       | V445I    | 1         | 0.13248603393474248                |
| I       | G446V    | 4         | -0.4012543263543365                |
| I       | D467V    | 1         | -0.33737906195422496               |
| I       | I468F    | 1         | -0.08992045572938752               |
| I       | E471Q    | 1         | 0.496588369182639                  |
| I       | A475V    | 1         | -1.0578345095256103                |
| I       | S477I    | 2         | 0.26875869860161683                |
| I       | S477N    | 18        | 0.13667010071316804                |
| I       | T478I    | 3         | -2.1527245830789186                |
| I       | P479S    | 12        | -1.1671696465218049                |
| I       | E484K    | 2         | 0.8488387065159884                 |
| I       | E484Q    | 1         | -1.2015335893061114                |
| I       | F490S    | 1         | 0.5637651510270204                 |
| I       | P491R    | 2         | -0.9932790113649753                |
| I       | Q493L    | 2         | -0.8654926033978836                |
| I       | S494P    | 3         | -0.17593616566096387               |
| I       | L518I    | 2         | 0.19175847380447125                |
| I       | H519Q    | 1         | -0.046046709226659814              |
| I       | A520S    | 6         | 0.03167236771877934                |
| I       | A520V    | 1         | 0.03974669900670044                |
| I       | P521R    | 3         | -0.32702169487318955               |
| I       | P521S    | 2         | -0.025743348681811433              |
| I       | A522S    | 5         | 0.0736485654015457                 |
| II      | P337S    | 1         | -0.057788809702088315              |
| II      | F338L    | 3         | 0.36052969791469974                |
| II      | W353R    | 1         | -0.3918016236672974                |
| II      | N354D    | 2         | 0.21033658718881246                |
| II      | N354K    | 2         | 0.35806448022647774                |
| II      | D364Y    | 2         | 0.036473001468085235               |
| II      | V367F    | 11        | 1.155442051834433                  |

Continued on next page

Table S3 – continued from previous page

| Cluster | Mutation | Frequency | Binding affinity change (kcal/mol) |
|---------|----------|-----------|------------------------------------|
| II      | V382L    | 1         | -0.4911188069529559                |
| II      | P384L    | 1         | -0.16402580528226846               |
| II      | V395I    | 1         | -0.3446213859997917                |
| II      | R408I    | 1         | 0.856911217217483                  |
| II      | Q414E    | 1         | -0.07626851449790645               |
| II      | V445A    | 1         | 0.5060805370683044                 |
| II      | G446V    | 1         | -0.4012543263543365                |
| II      | G446S    | 1         | -0.14332357257299147               |
| II      | L455F    | 1         | -0.6679875181636354                |
| II      | K458N    | 1         | 0.4945628365122759                 |
| II      | I468T    | 3         | -0.18186774146569967               |
| II      | I468V    | 4         | 0.01123955278800625                |
| II      | E471Q    | 1         | 0.496588369182639                  |
| II      | A475V    | 2         | -1.0578345095256103                |
| II      | S477G    | 1         | 0.3495445252588135                 |
| II      | T478I    | 1         | -2.1527245830789186                |
| II      | N481D    | 1         | -0.05782995510366806               |
| II      | N481H    | 1         | -0.4289756801167375                |
| II      | V483F    | 1         | -0.1423809411877248                |
| II      | F490L    | 2         | 0.43675979855389196                |
| II      | F490S    | 1         | 0.5637651510270204                 |
| II      | P491R    | 1         | -0.9932790113649753                |
| II      | S494P    | 1         | -0.17593616566096387               |
| II      | Y508H    | 1         | -0.086199490516408                 |
| II      | R509K    | 1         | 0.9500465207010513                 |
| II      | V510L    | 1         | -0.27304440255055507               |
| II      | A520S    | 3         | 0.03167236771877934                |
| II      | A522S    | 1         | 0.0736485654015457                 |
| III     | A344S    | 2         | -0.09148279588881875               |
| III     | N354S    | 1         | 1.0806328048122054                 |
| III     | S359N    | 1         | 0.366390266794583                  |
| III     | V367F    | 1         | 1.155442051834433                  |
| III     | S373L    | 1         | -0.3254958273948853                |
| III     | P384L    | 4         | -0.16402580528226846               |
| III     | P384S    | 1         | -0.16736687642169268               |
| III     | R408I    | 1         | 0.856911217217483                  |
| III     | Q414K    | 1         | 0.2979791184958904                 |
| III     | Q414R    | 1         | 0.09033073898683257                |
| III     | K417R    | 1         | -0.1766171087241206                |
| III     | D427Y    | 1         | -0.0780911400620959                |
| III     | G446V    | 6         | -0.4012543263543365                |
| III     | G476S    | 3         | -0.37562039340158543               |
| III     | S477N    | 34        | 0.13667010071316804                |
| III     | S477R    | 2         | 0.2589101045993276                 |
| III     | T478I    | 11        | -2.1527245830789186                |
| III     | V483F    | 1         | -0.1423809411877248                |
| III     | E484D    | 3         | 2.5377213028701293                 |
| III     | E484K    | 2         | 0.8488387065159884                 |
| III     | Q493L    | 1         | -0.8654926033978836                |
| III     | S494P    | 1         | -0.17593616566096387               |

Continued on next page



**Table S3 – continued from previous page**

| Cluster | Mutation | Frequency | Binding affinity change (kcal/mol) |
|---------|----------|-----------|------------------------------------|
| III     | L518I    | 1         | 0.19175847380447125                |
| III     | P521S    | 1         | -0.025743348681811433              |
| III     | A522P    | 1         | 0.012553352056879272               |
| IV      | N354K    | 5         | 0.35806448022647774                |
| IV      | S359N    | 1         | 0.366390266794583                  |
| IV      | P384L    | 1         | -0.16402580528226846               |
| IV      | P384S    | 3         | -0.16736687642169268               |
| IV      | Q414E    | 4         | -0.07626851449790645               |
| IV      | Q414K    | 1         | 0.2979791184958904                 |
| IV      | K417N    | 1         | 1.8393464219112645                 |
| IV      | G446V    | 1         | -0.4012543263543365                |
| IV      | L452R    | 2         | 2.506045056281037                  |
| IV      | I472V    | 1         | 0.13755553567167822                |
| IV      | G476S    | 1         | -0.37562039340158543               |
| IV      | S477R    | 3         | 0.2589101045993276                 |
| IV      | P479L    | 1         | -0.025670101732213135              |
| IV      | F490L    | 1         | 0.43675979855389196                |
| IV      | S494P    | 1         | -0.17593616566096387               |
| IV      | L518I    | 3         | 0.19175847380447125                |
| IV      | A520S    | 1         | 0.03167236771877934                |
| IV      | A522S    | 1         | 0.0736485654015457                 |
| V       | P337S    | 1         | -0.057788809702088315              |
| V       | V341I    | 10        | -0.6840279672104417                |
| V       | A344S    | 1         | -0.09148279588881875               |
| V       | V367F    | 3         | 1.155442051834433                  |
| V       | T385A    | 1         | 0.30752735295981476                |
| V       | R403S    | 1         | 1.0159224763603825                 |
| V       | Q414K    | 1         | 0.2979791184958904                 |
| V       | Q414R    | 1         | 0.09033073898683257                |
| V       | S438F    | 2         | 0.4669774102303501                 |
| V       | N439K    | 40        | 1.4272485828790165                 |
| V       | G446V    | 1         | -0.4012543263543365                |
| V       | N450K    | 1         | -0.1289154953463872                |
| V       | G485S    | 1         | -0.46991910769565354               |
| V       | Q493L    | 1         | -0.8654926033978836                |
| V       | Y508H    | 1         | -0.086199490516408                 |
| V       | A520V    | 1         | 0.03974669900670044                |
| VI      | A344S    | 1         | -0.09148279588881875               |
| VI      | A348T    | 1         | 0.5659671045565193                 |
| VI      | N354K    | 1         | 0.35806448022647774                |
| VI      | V367F    | 1         | 1.155442051834433                  |
| VI      | G476S    | 6         | -0.37562039340158543               |
| VI      | V483A    | 30        | 0.07757513964237478                |
| VI      | A520S    | 5         | 0.03167236771877934                |
| VI      | A522S    | 2         | 0.0736485654015457                 |

## S2.2 Predicted BA changes for most likely, likely, and unlikely future mutations

Table S4, Table S5, and Table S6 predicted BA changes for most likely, likely, and unlikely future mutations, respectively.

Table S4: Most likely mutation binding affinity change prediction. Residue ID is according to SARS-CoV-2.

| Mutations | Binding affinity change (kcal/mol) | Mutations | Binding affinity change (kcal/mol) |
|-----------|------------------------------------|-----------|------------------------------------|
| T333S     | 0.24913391236864485                | T333P     | 0.4948450195626233                 |
| T333A     | 0.29643295322361884                | T333K     | 0.24620078919692548                |
| T333I     | 0.4492306933718574                 | T333R     | 0.1850244150885822                 |
| N334Y     | 0.012101605495477376               | N334H     | 0.01873899635169411                |
| N334D     | 0.90664742343163                   | N334I     | -1.4998660225663956                |
| N334T     | 0.21676557979348612                | N334S     | 0.16403075990607197                |
| N334K     | 0.2964534357367737                 | L335M     | 0.04529483584560694                |
| L335V     | 0.1933082001870466                 | L335S     | -0.03863994891012686               |
| L335W     | 0.013660413714865727               | L335F     | 0.06928648414955062                |
| C336S     | 0.3389031732622413                 | C336R     | -0.26035352195914585               |
| C336G     | 0.5522520010453154                 | C336Y     | 0.14365397266408633                |
| C336F     | 0.15363147106748784                | C336W     | 0.37738254464411264                |
| P337T     | -0.007713270032751285              | P337S     | 0.04432167144462246                |
| P337A     | 0.29087550949069935                | P337H     | 0.2807148520459687                 |
| P337L     | 0.2205250410348804                 | P337R     | 0.3929714513126442                 |
| F338I     | 0.8655540034033651                 | F338L     | 0.4663890476735936                 |
| F338V     | 0.9276461736291889                 | F338Y     | 0.02803607787959067                |
| F338S     | 1.6610890038152504                 | F338C     | 2.6318584493855646                 |
| G339S     | 0.18509093279916838                | G339C     | 0.24732078620489778                |
| G339R     | 0.3173055015233107                 | G339D     | 0.18067056501052392                |
| G339V     | 0.41185478121553                   | G339A     | 0.3281601229440679                 |
| E340K     | -0.06991657581872732               | E340Q     | 0.04872937130261334                |
| E340V     | -0.1761046051860954                | E340A     | 0.21468823120010366                |
| E340G     | 0.014256306619225407               | E340D     | 0.024657318990608572               |
| V341I     | -0.3211503967541004                | V341F     | -0.09746318875188693               |
| V341L     | -0.03358242733110293               | V341D     | 0.5932199944987488                 |
| V341A     | 0.5613690277328757                 | V341G     | 0.6029333734376439                 |
| F342I     | 1.2113921068873323                 | F342L     | 0.9237039948652737                 |
| F342V     | 1.2135847993354798                 | F342Y     | 1.4872086687296062                 |
| F342S     | 1.1148676549647631                 | F342C     | 1.5104419288859887                 |
| N343Y     | 0.03271457644396167                | N343H     | -0.24046773387026305               |
| N343D     | -0.07888703233719371               | N343I     | 0.12313161905096096                |
| N343T     | -0.24375880860442667               | N343S     | 0.00864342072808808                |
| N343K     | 0.10760297467057281                | A344T     | -0.007049228223977383              |
| A344S     | -0.04125198258324198               | A344P     | -1.2742964505287293                |
| A344D     | -0.008789848601416166              | A344V     | -0.11437960158527141               |
| A344G     | 0.17428569739920588                | T345S     | 0.12576057214093883                |
| T345P     | 0.24980595488927998                | T345A     | 0.1853882956812602                 |
| T345N     | 0.16281247902635754                | T345I     | 0.22413429251094935                |
| R346G     | 0.13249084224177277                | R346K     | 0.6113937933023611                 |
| R346I     | 0.2370591325334817                 | R346T     | 0.4607626695711703                 |
| R346S     | 0.5734018850782477                 | F347I     | 1.6124256772769112                 |
| F347L     | -1.5591498142694724                | F347V     | 0.1409745319048388                 |
| F347Y     | -0.642952278656219                 | F347S     | -0.8635148204711409                |
| F347C     | 0.9415192577610763                 | A348T     | 0.4032798999039886                 |
| A348S     | -0.011716079731933764              | A348P     | -0.18598365599130073               |

Continued on next page

Table S4 – continued from previous page

| Mutations | Binding affinity change (kcal/mol) | Mutations | Binding affinity change (kcal/mol) |
|-----------|------------------------------------|-----------|------------------------------------|
| A348E     | 0.4516308237180057                 | A348V     | 0.12136804727956174                |
| A348G     | 0.011490780819049513               | S349T     | 0.12877221060745808                |
| S349P     | 0.23672124917735604                | S349A     | 0.3929734880693034                 |
| S349Y     | 0.3452287648403499                 | S349F     | 0.28207506769031887                |
| S349C     | 0.4650705624882298                 | V350I     | 0.021581481691081948               |
| V350F     | -0.1902935396529904                | V350L     | -0.3960556226201801                |
| V350D     | 1.1231347007388703                 | V350A     | 0.3793293736563982                 |
| V350G     | 0.9577734170189803                 | Y351N     | 1.1053760563745418                 |
| Y351H     | -0.06460547264795223               | Y351D     | -0.3080558774584835                |
| Y351F     | 1.0225577918673907                 | Y351S     | 1.3551176285940587                 |
| Y351C     | 1.586399116760241                  | A352T     | -0.2230434123896357                |
| A352S     | -0.20085406636820496               | A352P     | -0.11218219876239152               |
| A352D     | -0.23714037897566692               | A352V     | -0.009653812605597074              |
| A352G     | -0.041969250598363726              | W353R     | -0.24341517171511334               |
| W353G     | 0.5172124515511507                 | W353L     | -0.8201659179799492                |
| W353S     | -0.15600346107590768               | W353C     | 0.33619294201984296                |
| N354Y     | 0.03878260602178178                | N354H     | 0.35220179134011037                |
| N354D     | 0.26141794315673145                | N354I     | 0.46021554118267555                |
| N354T     | 0.5903630768907759                 | N354S     | 0.9428101661334573                 |
| N354K     | 0.3757453952423922                 | R355W     | -0.016051723946579128              |
| R355G     | 0.38767673181753504                | R355K     | 0.3713112142946372                 |
| R355M     | -0.7439990038120337                | R355T     | 0.47345028303616254                |
| R355S     | 0.6751859143084539                 | K356Q     | 0.2509070528907299                 |
| K356E     | 0.15832333351359815                | K356M     | 0.11650832060605343                |
| K356T     | -0.06939424320841683               | K356R     | 0.11143680877733034                |
| K356N     | 0.1265735783626832                 | R357G     | 0.1338347348024357                 |
| R357K     | -0.17391128364842828               | R357I     | -0.14843615110798314               |
| R357T     | 0.10220787113357355                | R357S     | 0.28425698265191035                |
| I358F     | 0.002925421892911681               | I358L     | -0.057688353473168884              |
| I358V     | 0.2086360593742474                 | I358N     | 0.10279875890107408                |
| I358T     | 0.23328533860481895                | I358S     | -1.3441081822776157                |
| I358M     | 0.08394334766305026                | S359C     | 0.5777236355256218                 |
| S359R     | 0.5887407355315373                 | S359G     | 0.4700168587190453                 |
| S359N     | 0.20661801749345393                | S359I     | 0.6414125035450409                 |
| S359T     | 0.6713327079295475                 | N360Y     | 0.1266004579395466                 |
| N360H     | 0.19724314966628895                | N360D     | 0.08325735519144452                |
| N360I     | 0.2343105749173675                 | N360T     | 0.036945176952569866               |
| N360S     | 0.12972416453303576                | N360K     | 0.07942225993308014                |
| C361S     | 0.2568848165363412                 | C361R     | 0.261297626257119                  |
| C361G     | 0.32125428801463624                | C361Y     | 0.35235346139222173                |
| C361F     | 0.5694415592116309                 | C361W     | 0.32924551469213814                |
| V362I     | 0.1563934258071795                 | V362F     | 0.08835007249191264                |
| V362L     | 0.15494780881891695                | V362D     | -0.34412619120599913               |
| V362A     | 0.2628488243984194                 | V362G     | 0.19710671813841138                |
| A363T     | 0.07951828164544741                | A363S     | 0.058553496194755826               |
| A363P     | 0.11973934402695019                | A363D     | -0.29681249039227287               |
| A363V     | 1.9440144433663051                 | A363G     | 2.108947217680433                  |
| D364N     | 0.3047344418940573                 | D364Y     | 0.10347150378416836                |
| D364H     | 0.269749210791841                  | D364V     | 0.06208207818277717                |
| D364A     | 0.35933030204299526                | D364G     | 0.19526855692711026                |

Continued on next page

**Table S4 – continued from previous page**

| Mutations | Binding affinity change (kcal/mol) | Mutations | Binding affinity change (kcal/mol) |
|-----------|------------------------------------|-----------|------------------------------------|
| D364E     | 0.44661069159913713                | Y365N     | 0.1325377601379911                 |
| Y365H     | -0.05798150751242165               | Y365D     | 0.45911015238238295                |
| Y365F     | 1.8303467550853239                 | Y365S     | 1.2143022550142324                 |
| Y365C     | 0.629862479956575                  | S366T     | -1.2755898198238425                |
| S366P     | -0.11193067904000979               | S366A     | 0.09277272574687871                |
| S366Y     | 0.05516937651434815                | S366F     | 0.0522302090835763                 |
| S366C     | 0.07640235176529288                | V367I     | -0.09965983280453664               |
| V367F     | 0.8357106189680511                 | V367L     | 0.46253698405069155                |
| V367D     | 0.5546610985945162                 | V367A     | 0.6944872228751848                 |
| V367G     | 0.45832743364029627                | L368I     | 0.10664773629572892                |
| L368V     | 0.3666610186292523                 | L368Q     | -1.8151831713737052                |
| L368P     | 0.7255393229724192                 | L368R     | 0.008990635555027266               |
| Y369N     | -1.4727011814925246                | Y369H     | -1.3487423396015434                |
| Y369D     | -0.01911792858384651               | Y369F     | 0.125066954371854                  |
| Y369S     | 0.6203837980404984                 | Y369C     | -0.11014317243587139               |
| N370Y     | -0.8337992345089716                | N370H     | -0.14185666287409884               |
| N370D     | 0.07606209223365797                | N370I     | 0.26793632223451963                |
| N370T     | 0.22320660599308764                | N370S     | 0.18426571378467177                |
| N370K     | 0.023851509758524053               | S371T     | -0.7244153578164689                |
| S371P     | 0.2200931640273362                 | S371A     | -0.2412900065519258                |
| S371Y     | -2.0840308059246886                | S371F     | -0.5882262830160941                |
| S371C     | -0.2922865221794804                | A372T     | 0.11466710059611844                |
| A372S     | 0.03613190962953393                | A372P     | 0.22576789141400347                |
| A372E     | 0.18417383612394758                | A372V     | 0.19328441257250478                |
| A372G     | 0.16513528072965544                | S373T     | -0.029163415076847787              |
| S373P     | 0.27794468166360714                | S373A     | -0.3462189279495859                |
| S373L     | -0.4397830055999882                | F374I     | 0.15990307910411006                |
| F374L     | 0.20307149060772098                | F374V     | 0.22563685109975426                |
| F374Y     | -0.129342508232773                 | F374S     | 0.13418494381770435                |
| F374C     | 0.3546236329046702                 | S375T     | -0.5060385543288999                |
| S375P     | 0.3070648736640623                 | S375A     | 0.4326059683380419                 |
| S375Y     | -0.3375955110705636                | S375F     | -0.5316744989240492                |
| S375C     | 0.4405635562417041                 | T376S     | 0.0718146559745398                 |
| T376P     | 0.05919265993715504                | T376A     | 0.3624931894389257                 |
| T376N     | -0.5906725478857087                | T376I     | 0.024598157775892426               |
| F377I     | 0.3141751810966202                 | F377L     | 0.27952673971917136                |
| F377V     | 0.6562454301611154                 | F377Y     | -0.39774828545547136               |
| F377S     | 0.3206345173841759                 | F377C     | 0.5231008401097254                 |
| K378Q     | 0.32705711689961353                | K378E     | 0.24883658036110448                |
| K378M     | 0.4523417202939453                 | K378T     | 0.13061324848240835                |
| K378R     | -0.15902452750926768               | K378N     | 0.4142852481376374                 |
| C379S     | 0.1778139782336757                 | C379R     | 0.05765032951688944                |
| C379G     | 0.35257802580179975                | C379Y     | 0.3316685356352388                 |
| C379F     | 0.22857860616784645                | C379W     | 0.025659924009120687               |
| Y380N     | 0.09133626650378264                | Y380H     | -2.3276170188469316                |
| Y380D     | 0.22073311712403312                | Y380F     | -1.1627187739374185                |
| Y380S     | 0.4209740415613513                 | Y380C     | 0.5393426508552451                 |
| G381R     | 0.08945722642526073                | G381E     | -1.0925755200732723                |
| G381V     | 0.4325222313873945                 | G381A     | 0.334874229430187                  |
| V382M     | 0.1780464548599529                 | V382L     | -0.4288208969463881                |

Continued on next page

**Table S4 – continued from previous page**

| Mutations | Binding affinity change (kcal/mol) | Mutations | Binding affinity change (kcal/mol) |
|-----------|------------------------------------|-----------|------------------------------------|
| V382E     | 0.032243580147796144               | V382A     | 0.24485410662669524                |
| V382G     | 0.2106174081543135                 | S383T     | 0.22755446312971928                |
| S383P     | 0.38566279682859156                | S383A     | 0.3548776472606493                 |
| S383Y     | 0.30056010531080596                | S383F     | 0.34144347905092415                |
| S383C     | 0.21935292266440812                | P384T     | -0.28852260587365736               |
| P384S     | -0.08772259168302372               | P384A     | 0.2205376728977571                 |
| P384H     | -0.04463099868489974               | P384L     | -0.0981901800391797                |
| P384R     | -0.24505324398617684               | T385S     | 0.12955399863136277                |
| T385P     | 0.3670779020985816                 | T385A     | 0.2331104551774414                 |
| T385N     | 0.15390850110324683                | T385I     | 0.2273591133643742                 |
| K386Q     | 0.10680580246705618                | K386E     | 0.13077332597653296                |
| K386I     | 0.09478580023388018                | K386T     | 0.22019740195961837                |
| K386R     | 0.14710112443956633                | K386N     | 0.017022570170579378               |
| L387I     | -0.10583642472021784               | L387V     | 0.21114198630111547                |
| L387S     | 0.17587248245262513                | L387F     | -0.09221112665096451               |
| N388Y     | -0.7857832341546318                | N388H     | 0.6158159763512802                 |
| N388D     | -0.6135633963531206                | N388I     | 0.28866952151548775                |
| N388T     | 0.1443114582475875                 | N388S     | 0.1683248626108456                 |
| N388K     | 0.553648170180494                  | D389N     | 0.18513629116128424                |
| D389Y     | 0.06637410398009147                | D389H     | -0.21394110711289618               |
| D389V     | 0.059138973862084374               | D389A     | -0.337577246585835                 |
| D389G     | -0.4902119125927527                | D389E     | 0.29352122566186123                |
| L390I     | 0.15930610337493398                | L390F     | 0.036925049729395074               |
| L390V     | 0.2584943674685412                 | L390H     | -0.18339121240624376               |
| L390P     | -0.1645605794277048                | L390R     | 0.0984795105324792                 |
| C391S     | 0.5772808430184776                 | C391R     | 0.5401557036700838                 |
| C391G     | 0.6115377395951113                 | C391Y     | 0.5300637163530482                 |
| C391F     | 0.44949811772619475                | C391W     | 0.5884743913670197                 |
| F392I     | 0.035374183687838956               | F392L     | 0.20140339909449884                |
| F392V     | 0.21632957178350892                | F392Y     | 0.006359916036343558               |
| F392S     | -1.1809039727104298                | F392C     | 0.4698665327385106                 |
| T393S     | 0.3292814375651362                 | T393P     | 0.13429738001163277                |
| T393A     | 0.414616695963079                  | T393N     | 0.27492658248633034                |
| T393I     | 0.2881433465466534                 | N394Y     | 0.264495444487595                  |
| N394H     | 0.264826188064102                  | N394D     | -0.29441928677136625               |
| N394I     | 0.254838578687291                  | N394T     | -0.36605374895158865               |
| N394S     | -0.0220835765530737                | N394K     | 0.3336423977299207                 |
| V395I     | -0.22839404731608548               | V395F     | -0.33519290108600375               |
| V395L     | -0.121952833195517                 | V395D     | -0.12338889217624423               |
| V395A     | -0.004151718046287715              | V395G     | 0.0009771860708210761              |
| Y396N     | 0.21532967561631677                | Y396H     | -1.5684581318900213                |
| Y396D     | 0.004873953130532212               | Y396F     | 0.27264829591886375                |
| Y396S     | 0.1304348694340659                 | Y396C     | 0.4172680064190146                 |
| A397T     | -0.40837169429003206               | A397S     | -0.2815186022991424                |
| A397P     | -0.16227202002810442               | A397E     | -0.1873477118097272                |
| A397V     | -0.15631680954281063               | A397G     | -0.04853078811786507               |
| D398N     | -0.08479992255783457               | D398Y     | 1.486713816155063                  |
| D398H     | 0.21148299103726792                | D398V     | -0.2735299498022382                |
| D398A     | 0.4287607807915805                 | D398G     | 0.8526580139431525                 |
| D398E     | 1.1097593769090877                 | S399T     | -0.12384162028931327               |

Continued on next page

Table S4 – continued from previous page

| Mutations | Binding affinity change (kcal/mol) | Mutations | Binding affinity change (kcal/mol) |
|-----------|------------------------------------|-----------|------------------------------------|
| S399P     | 0.16644626977542498                | S399A     | 0.5160785681789303                 |
| S399L     | 0.3315484181653289                 | F400I     | 0.5624892537921723                 |
| F400L     | 0.48434106945179706                | F400V     | 2.644092470304538                  |
| F400Y     | -0.8901678369338406                | F400S     | 1.1945694987817062                 |
| F400C     | 3.451682681938329                  | V401I     | -0.021154563716588536              |
| V401L     | -0.45958522696902826               | V401E     | 1.3923671215021902                 |
| V401A     | 0.07763754173552899                | V401G     | -0.12602217066906035               |
| I402F     | -0.5252064012760208                | I402L     | -0.7042674394953443                |
| I402V     | 0.2172987445030746                 | I402N     | -0.042533199051799066              |
| I402T     | -0.19254666354298014               | I402S     | 0.2669057363437908                 |
| I402M     | 0.9094373436111486                 | R403G     | 0.24927845306619326                |
| R403K     | -0.1540014483229981                | R403I     | -3.3642539977774257                |
| R403T     | 0.743129927202145                  | R403S     | 1.5372714651165202                 |
| G404S     | -0.2781582647713932                | G404C     | -0.3156706651840403                |
| G404R     | 1.2801678757472632                 | G404D     | -2.5070696867934488                |
| G404V     | -0.7511410694944046                | G404A     | 1.0608956281422686                 |
| D405N     | 0.3233007184794145                 | D405Y     | -0.4253565386814139                |
| D405H     | 2.275054773721481                  | D405V     | 0.09462640917076834                |
| D405A     | 0.6732732684321031                 | D405G     | 1.6526500834751623                 |
| D405E     | 0.8804340274741567                 | E406K     | 1.3527116589995234                 |
| E406Q     | -0.5797458043970181                | E406V     | -0.08351739666869787               |
| E406A     | -1.3890266192823824                | E406G     | 1.6947619062794346                 |
| E406D     | -0.07774894454469768               | V407I     | 0.1961745599540688                 |
| V407F     | 0.1776740017219499                 | V407L     | 0.4242521718741109                 |
| V407D     | -0.4199253741675938                | V407A     | 0.5633764682459477                 |
| V407G     | 0.5515388069100433                 | R408G     | 0.525137323276756                  |
| R408K     | 0.15551380141748639                | R408I     | 0.7185229732219426                 |
| R408T     | -0.13776833168085173               | R408S     | 0.40457294209047967                |
| Q409K     | -0.11441906152653065               | Q409E     | 0.17618982355936624                |
| Q409L     | 0.4525461777057395                 | Q409P     | 0.923368938785474                  |
| Q409R     | 0.053605078126428604               | Q409H     | 0.208567241035503                  |
| I410F     | 0.07510816621228911                | I410L     | 0.08662183972562806                |
| I410V     | 1.775842962360041                  | I410N     | -1.2753178333262647                |
| I410T     | 0.04456183975801921                | I410S     | 0.08339975014957558                |
| I410M     | 0.8433003289392225                 | A411T     | -0.05064235892989225               |
| A411S     | 0.1022560363053419                 | A411P     | 0.924340535366993                  |
| A411D     | 0.39819129331837744                | A411V     | 0.4781565178582413                 |
| A411G     | -0.11336103623893032               | P412T     | 0.049381369787584437               |
| P412S     | 1.5148005318044584                 | P412A     | 0.0942161218364969                 |
| P412Q     | 0.6306068663342914                 | P412L     | -0.16042093877106295               |
| P412R     | -0.15501234206073894               | G413R     | 0.10524007427218703                |
| G413W     | 0.3941851240751258                 | G413E     | 0.2815702331976316                 |
| G413V     | 0.3146613237639368                 | G413A     | 0.2656546683262053                 |
| Q414K     | 0.3142601222028851                 | Q414E     | 0.013471069748342751               |
| Q414L     | 0.0869188738717254                 | Q414P     | 0.18669390624215132                |
| Q414R     | 0.16202354109424297                | Q414H     | 0.2186848690664772                 |
| T415S     | 0.19609141221460719                | T415P     | 0.3440606463959551                 |
| T415A     | 0.31131280969290426                | T415N     | 0.05914039721018408                |
| T415I     | 0.21295684964547848                | G416R     | -0.23181046473918662               |
| G416E     | -0.7671563768241201                | G416V     | -0.334256354881596                 |

Continued on next page

**Table S4 – continued from previous page**

| Mutations | Binding affinity change (kcal/mol) | Mutations | Binding affinity change (kcal/mol) |
|-----------|------------------------------------|-----------|------------------------------------|
| G416A     | 0.05759965944640836                | K417Q     | 0.7289986555705803                 |
| K417E     | 2.2588807839231175                 | K417M     | 0.42630365062194775                |
| K417T     | 1.1213620774655302                 | K417R     | -0.6318493868181239                |
| K417N     | 1.624001401293493                  | I418F     | 0.3290550732515197                 |
| I418L     | 0.5132705933061522                 | I418V     | 0.3302798600140032                 |
| I418N     | 0.3211171712807716                 | I418T     | 0.5150068497932977                 |
| I418S     | 0.6329868604250599                 | I418M     | 0.1383790717683886                 |
| A419T     | -0.24862589304634067               | A419S     | -0.20941374076150182               |
| A419P     | 0.059952008001694514               | A419D     | -0.46566224778160015               |
| A419V     | 0.12366232822677066                | A419G     | 0.1632768811911982                 |
| D420N     | 0.09138004295415995                | D420Y     | -2.0208215320592275                |
| D420H     | -2.194496207205497                 | D420V     | -0.25462864637382576               |
| D420A     | 0.3392721822667723                 | D420G     | -1.1756188707733155                |
| D420E     | 0.08324130457079953                | Y421N     | 1.480409938666254                  |
| Y421H     | 2.198062933549146                  | Y421D     | 0.9529022252884483                 |
| Y421F     | -1.4558124521904225                | Y421S     | 3.2777806006492733                 |
| Y421C     | 2.342762029425388                  | N422Y     | -0.23427006767341077               |
| N422H     | -0.7821514543640347                | N422D     | 1.1944264057857295                 |
| N422I     | 1.7944083950864644                 | N422T     | 0.12337691134769908                |
| N422S     | 0.5132231752931145                 | N422K     | 1.081515928131789                  |
| Y423N     | 0.3294633862934705                 | Y423H     | 2.410859599402351                  |
| Y423D     | 0.6906496509736977                 | Y423F     | 2.993016039259897                  |
| Y423S     | 2.7200706254543365                 | Y423C     | 4.123301561003104                  |
| K424Q     | -0.14203887214705135               | K424E     | -2.951883716302306                 |
| K424I     | 0.5574081079151687                 | K424T     | -0.4387999807983746                |
| K424R     | -0.148088126357111                 | K424N     | -0.5573864029090279                |
| L425I     | 0.1169792325032821                 | L425V     | 0.104287323241625                  |
| L425S     | -0.13346610066638237               | L425F     | -0.25258304580683455               |
| P426T     | 0.029968957578821526               | P426S     | 0.07086988619890666                |
| P426A     | 0.36332393860460893                | P426Q     | -1.0534607658983988                |
| P426L     | 0.21553808747549094                | P426R     | -0.8571390693635053                |
| D427N     | -0.5116975923576057                | D427Y     | 0.042660830965629455               |
| D427H     | -1.6557859954113439                | D427V     | -1.5438530525696772                |
| D427A     | -1.3168996248518137                | D427G     | -1.4602862260359717                |
| D427E     | 0.26078039951428944                | D428N     | 0.15523465924996288                |
| D428Y     | 0.22116660883306163                | D428H     | 0.19046449896005044                |
| D428V     | 0.09114992197098779                | D428A     | 0.2032667470049528                 |
| D428G     | 0.10979108314385486                | D428E     | 0.39905438947904404                |
| F429I     | 0.5666759538606381                 | F429L     | 0.41770485592769935                |
| F429V     | 0.7521433967119527                 | F429Y     | -0.5826400139098615                |
| F429S     | 0.3627064520960252                 | F429C     | 0.9577695972637637                 |
| T430S     | 0.11265285337756062                | T430P     | 0.045351924823145096               |
| T430A     | 0.23973959336915715                | T430K     | 0.1202123112351768                 |
| T430I     | -0.045213658138019086              | T430R     | 0.08138621912904008                |
| G431S     | -0.5808840517103666                | G431C     | 0.8826458305138705                 |
| G431R     | -1.3647423032480752                | G431D     | -0.5496934779391942                |
| G431V     | 1.2005952491167458                 | G431A     | 0.9539525457756601                 |
| C432S     | 0.41470807234679474                | C432R     | -1.2109021923174397                |
| C432G     | 0.5330499107503103                 | C432Y     | -1.0332313498964818                |
| C432F     | 0.22543764490686763                | C432W     | -1.1908631190467514                |

Continued on next page

**Table S4 – continued from previous page**

| Mutations | Binding affinity change (kcal/mol) | Mutations | Binding affinity change (kcal/mol) |
|-----------|------------------------------------|-----------|------------------------------------|
| V433I     | 0.01799703077221899                | V433F     | -0.21600502409453975               |
| V433L     | 0.07886221145124853                | V433D     | 0.5849996778014136                 |
| V433A     | 1.1214008899104644                 | V433G     | 2.1499434278973277                 |
| I434L     | 2.028915216128472                  | I434V     | 0.17521781481652982                |
| I434K     | 1.2095539957369579                 | I434T     | 0.7596976149377997                 |
| I434R     | -0.6514806836435769                | I434M     | 0.9148790521737103                 |
| A435T     | -0.7841949353787718                | A435S     | -0.5098448530507129                |
| A435P     | -0.1599593498748767                | A435D     | -0.7849945152109113                |
| A435V     | -0.4457231953154565                | A435G     | -0.08149129214492341               |
| W436R     | 0.10641740902084809                | W436G     | -0.4156442186409201                |
| W436L     | 0.037191147948873085               | W436S     | 0.4176544599542121                 |
| W436C     | 0.28870321816995087                | N437Y     | -0.008799824688542485              |
| N437H     | 0.20625688614546514                | N437D     | -0.3161040827949376                |
| N437I     | -0.11856385438817867               | N437T     | 0.24107701193460707                |
| N437S     | 0.49845666891100315                | N437K     | -0.42438425302908883               |
| S438T     | 0.21848620597966928                | S438P     | 0.2117594481756032                 |
| S438A     | 0.2531340781481068                 | S438Y     | 0.1557844398113804                 |
| S438F     | 0.47717653012743844                | S438C     | 0.5247244654834946                 |
| N439Y     | -0.009540820636208685              | N439H     | 0.31301399517655476                |
| N439D     | 0.07006643780839132                | N439I     | -0.08249445169763271               |
| N439T     | 0.3568026836933999                 | N439S     | 0.375686184032336                  |
| N439K     | 0.8626084497824443                 | N440Y     | -1.8247756018753905                |
| N440H     | 0.5891599359082569                 | N440D     | -1.3840589837979942                |
| N440I     | -0.028328699845948824              | N440T     | -0.020075192117766573              |
| N440S     | 0.12281112251352373                | N440K     | 0.11029036211884999                |
| L441I     | 0.030443897642331512               | L441F     | -0.0012812190088082396             |
| L441V     | 0.19826829375530824                | L441H     | 0.14015934005758668                |
| L441P     | -0.019971657620791793              | L441R     | -0.25373056129000326               |
| D442N     | -0.11877187944181274               | D442Y     | -0.1295048653055501                |
| D442H     | -0.44500299713543867               | D442V     | -0.573721522334031                 |
| D442A     | 0.34413082173378856                | D442G     | 0.24470082146987057                |
| D442E     | 0.38147094088094013                | S443T     | 0.07063796450729777                |
| S443P     | 0.2784689949984909                 | S443A     | 0.2062793912192055                 |
| S443Y     | -0.16931955802569204               | S443F     | -2.6481477874052515                |
| S443C     | 0.08952776179204079                | K444Q     | -0.18732041630599447               |
| K444E     | 0.8604902792616667                 | K444M     | 0.23812652369406498                |
| K444T     | 1.9965506900073156                 | K444R     | 0.2504666058531847                 |
| K444N     | 0.718715074337289                  | V445I     | 0.06435087193221263                |
| V445F     | -1.2659852736055262                | V445L     | -0.1280475228647033                |
| V445D     | 0.13295748821566344                | V445A     | 0.4216034932967716                 |
| V445G     | 0.31996898207718794                | G446S     | -0.17387687141232702               |
| G446C     | -0.19094948151993182               | G446R     | -0.687836948599875                 |
| G446D     | -0.1367938110150647                | G446V     | 0.05442393087119697                |
| G446A     | -0.2007756352951245                | G447S     | 0.04744051497484867                |
| G447C     | 0.3480424293921826                 | G447R     | -1.0280616803279075                |
| G447D     | -0.2588628337157757                | G447V     | -0.04652175938582986               |
| G447A     | 0.24610308414924648                | N448Y     | 0.12922003670402643                |
| N448H     | 1.171104344440943                  | N448D     | -0.16122217332601868               |
| N448I     | -0.35983590264618015               | N448T     | -0.9335467278865688                |
| N448S     | -0.22073942113902442               | N448K     | -0.24914995931274259               |

Continued on next page



Table S4 – continued from previous page

| Mutations | Binding affinity change (kcal/mol) | Mutations | Binding affinity change (kcal/mol) |
|-----------|------------------------------------|-----------|------------------------------------|
| Y449N     | 0.7062699391206391                 | Y449H     | 0.49493966180292226                |
| Y449D     | 1.0654150585561701                 | Y449F     | 0.5234238937362738                 |
| Y449S     | 1.3364421584633317                 | Y449C     | 1.331492393710499                  |
| N450Y     | 0.5877105715683469                 | N450H     | 0.012968994057574656               |
| N450D     | -0.12657818943358637               | N450I     | 0.5679072851169998                 |
| N450T     | 0.015643578967986776               | N450S     | 1.2281977272189715                 |
| N450K     | -0.10831459576993932               | Y451N     | -0.09026682554477479               |
| Y451H     | -0.0012062349276773152             | Y451D     | -0.04095067800308942               |
| Y451F     | 0.2325209046823503                 | Y451S     | 1.015896672388902                  |
| Y451C     | 0.8823129010436954                 | L452M     | 2.349587964412996                  |
| L452V     | 0.29354317612440584                | L452Q     | 2.1887790195889543                 |
| L452P     | 2.4632243701044003                 | L452R     | 1.8653280920071815                 |
| Y453N     | -0.09423622578022275               | Y453H     | -0.44727911888055216               |
| Y453D     | 0.6322687821615927                 | Y453F     | 0.5575955265164342                 |
| Y453S     | 1.1109809598875846                 | Y453C     | 1.339659466380781                  |
| R454G     | 0.42245879283728793                | R454K     | -0.36623438248348716               |
| R454I     | -0.4440403032554836                | R454T     | -2.5251335039262863                |
| R454S     | -0.15555359452543893               | L455M     | -0.26220942530639973               |
| L455V     | -0.07356810476614975               | L455S     | -0.14918947527779067               |
| L455W     | -1.3434850319410683                | L455F     | -0.8112384716968842                |
| F456I     | 0.7216267103680749                 | F456L     | 0.5779845797312917                 |
| F456V     | 0.9618559482357053                 | F456Y     | -0.3925375342775286                |
| F456S     | 0.6502816701948945                 | F456C     | 1.0548365219804094                 |
| R457W     | 0.13001776717859437                | R457G     | 0.17237171012974178                |
| R457K     | -0.0895233401203911                | R457M     | 0.3033133890549317                 |
| R457T     | -0.04153156513853915               | R457S     | 0.12813055384655103                |
| K458Q     | 0.07716316863544176                | K458E     | 0.7964354630121215                 |
| K458M     | 0.23699119672349314                | K458T     | 0.27428365401145827                |
| K458R     | 0.3209332112205051                 | K458N     | 0.34269851584990924                |
| S459T     | 0.10276386488532221                | S459P     | 0.05804425949371565                |
| S459A     | 0.18718570151743666                | S459Y     | -0.13607176722715364               |
| S459F     | -0.08434222004666371               | S459C     | 0.22033931329455275                |
| N460Y     | -0.02543756614274269               | N460H     | 1.3323631789661496                 |
| N460D     | 1.6765764464624282                 | N460I     | 1.8935796792141821                 |
| N460T     | 2.459084930681346                  | N460S     | 0.5813146900947588                 |
| N460K     | 0.92714207093615                   | L461I     | 0.06027602594098157                |
| L461F     | 0.012507969704434763               | L461V     | 0.21284415760183467                |
| L461H     | 1.7395607511439402                 | L461P     | 0.6343202045036624                 |
| L461R     | -0.7169704550433786                | K462Q     | 0.017469717724478997               |
| K462E     | 0.07438584193134455                | K462I     | -0.06937559188500307               |
| K462T     | -0.054311750986405574              | K462R     | 0.0044011392738165485              |
| K462N     | 0.07871123421299729                | P463T     | -0.15655582606833002               |
| P463S     | -0.049676568054920274              | P463A     | -0.06555794209778806               |
| P463H     | 0.23754907849067322                | P463L     | -0.24719989067499065               |
| P463R     | -0.29636947574889777               | F464I     | 0.09245662873990079                |
| F464L     | 0.019243984042158647               | F464V     | 0.14816546646730597                |
| F464Y     | -0.35072913772064135               | F464S     | -0.05445059403208905               |
| F464C     | -0.8944157401458165                | E465K     | -0.3459607249076006                |
| E465Q     | -0.020047811083925924              | E465V     | -0.15078178533127512               |
| E465A     | 0.1490120863290807                 | E465G     | 0.12115353825474587                |

Continued on next page

**Table S4 – continued from previous page**

| Mutations | Binding affinity change (kcal/mol) | Mutations | Binding affinity change (kcal/mol) |
|-----------|------------------------------------|-----------|------------------------------------|
| E465D     | -0.09367125537823659               | R466G     | 0.3956486561513509                 |
| R466K     | 0.18241439017072397                | R466I     | 0.25996889292824676                |
| R466T     | -1.0908445503280082                | R466S     | 0.17315716398091324                |
| D467N     | -0.14279158460847602               | D467Y     | -0.16145019273428096               |
| D467H     | -0.3085751999161742                | D467V     | -0.38525107070168235               |
| D467A     | 0.3492308461076162                 | D467G     | 0.37398851896838675                |
| D467E     | -0.07275863483602714               | I468F     | 0.009024957617629892               |
| I468L     | 0.07041429366230838                | I468V     | -0.04886220947746198               |
| I468N     | -0.01716925693626502               | I468T     | -0.13394971345113826               |
| I468S     | -0.12306215025787057               | I468M     | -0.10578080497517292               |
| S469T     | 0.052422840427469905               | S469P     | 0.2814272122661719                 |
| S469A     | 0.1347887992870976                 | S469L     | 0.1663104899573289                 |
| T470S     | -1.2293807599318005                | T470P     | 0.15365984771643743                |
| T470A     | 0.1360916690076706                 | T470N     | 0.023023570880600724               |
| T470I     | 0.16197924674591885                | E471K     | -0.05874277145438141               |
| E471Q     | 0.06304851211107892                | E471V     | -0.04138692630037956               |
| E471A     | 0.23627514973835345                | E471G     | 0.006622058578229367               |
| E471D     | 0.0652969684950794                 | I472F     | 0.01778145839059516                |
| I472L     | 0.1301357774893857                 | I472V     | 0.09109909722214632                |
| I472N     | 0.6892965618747763                 | I472T     | 0.05356791957294922                |
| I472S     | 0.24251291449441686                | I472M     | 0.2843851319345797                 |
| Y473N     | 0.6113315435659658                 | Y473H     | -2.9732918487460522                |
| Y473D     | 0.6386868732975338                 | Y473F     | 0.2928621285405816                 |
| Y473S     | 1.3895325641231766                 | Y473C     | 0.6556485838291759                 |
| Q474K     | -0.4387787647259482                | Q474E     | 0.004007791650379204               |
| Q474L     | 0.06361305227746093                | Q474P     | 0.5098965259009725                 |
| Q474R     | -0.3204586284758477                | Q474H     | 1.402351822801425                  |
| A475T     | -0.6875878850362699                | A475S     | -0.4825148455485497                |
| A475P     | -0.32512525412735716               | A475D     | -0.7856586539931625                |
| A475V     | -0.6193027554947864                | A475G     | 0.10082524074859771                |
| G476S     | 0.047926575826977694               | G476C     | -0.04926105400324925               |
| G476R     | 0.049971483614199654               | G476D     | -0.15056898099173044               |
| G476V     | 0.0963320671302791                 | G476A     | 0.22939633463302575                |
| S477C     | 0.0445152201005128                 | S477R     | 0.04069117804303392                |
| S477G     | 0.32808744945097706                | S477N     | 0.16282071917992852                |
| S477I     | 0.3495416683554832                 | S477T     | 0.20082813629022364                |
| T478S     | 0.2857294749927698                 | T478P     | -1.047292499672844                 |
| T478A     | 0.4618211916444747                 | T478K     | 0.16890741585464394                |
| T478I     | -1.1721065113832618                | T478R     | -0.06008539792854124               |
| P479T     | 0.03240812104995058                | P479S     | -1.3207445854417705                |
| P479A     | 0.13734689954303678                | P479H     | 0.11550682261605427                |
| P479L     | 0.12917370097840078                | P479R     | 0.2398194220251273                 |
| C480S     | 0.20824234924435006                | C480R     | -0.07651322557362124               |
| C480G     | 0.4291165889847104                 | C480Y     | 0.10834422259147578                |
| C480F     | 0.09610258363342504                | C480W     | -0.16284742088076148               |
| N481Y     | -0.3750152289389536                | N481H     | -0.345385267051758                 |
| N481D     | 0.013569647123549803               | N481I     | -0.0861503346958373                |
| N481T     | -0.1673955356453527                | N481S     | -0.02430566422405578               |
| N481K     | -0.07576559483883363               | G482S     | 0.15603048600019215                |
| G482C     | 0.0009635067538956647              | G482R     | 0.07647921777173014                |

Continued on next page

**Table S4 – continued from previous page**

| Mutations | Binding affinity change (kcal/mol) | Mutations | Binding affinity change (kcal/mol) |
|-----------|------------------------------------|-----------|------------------------------------|
| G482D     | 0.16936509498042585                | G482V     | 0.22577873886182367                |
| G482A     | 0.14169890205947194                | V483I     | 0.09401562862078862                |
| V483F     | -0.1318144196907681                | V483L     | 0.11588962218678231                |
| V483D     | 0.031894684430140076               | V483A     | 0.07090948635698724                |
| V483G     | 0.0266395905566901                 | E484K     | 0.3889980712601367                 |
| E484Q     | -1.4424535273020045                | E484V     | 0.775796004839009                  |
| E484A     | 1.0600757233168725                 | E484G     | 1.8009725848469558                 |
| E484D     | 1.9263429758355088                 | G485S     | -0.43379093498879645               |
| G485C     | 0.35304518796643525                | G485R     | 0.1507643971466069                 |
| G485D     | 0.2169335439650923                 | G485V     | 0.28238040397044073                |
| G485A     | 0.2517964058117856                 | F486I     | 0.7943534233601064                 |
| F486L     | 0.6860432734092584                 | F486V     | 1.0304461706367014                 |
| F486Y     | -0.26036361230492183               | F486S     | 0.9581795680047074                 |
| F486C     | 0.609926036625938                  | N487Y     | 0.2774858912764635                 |
| N487H     | 0.6296070158022531                 | N487D     | 0.4987990888782819                 |
| N487I     | 0.5042486194820142                 | N487T     | 0.38714371714547685                |
| N487S     | 0.6391572809945342                 | N487K     | 0.26262907031354493                |
| C488S     | 0.6226370074170549                 | C488R     | 0.17495175251210976                |
| C488G     | 0.3610472490805131                 | C488Y     | -0.3962077749547831                |
| C488F     | -0.08413639190044582               | C488W     | -0.17520777190153936               |
| Y489N     | 2.4692833591816017                 | Y489H     | 4.158511542648542                  |
| Y489D     | 3.9495188935545045                 | Y489F     | 3.160693058550614                  |
| Y489S     | 1.6654071272995847                 | Y489C     | 2.731243720265536                  |
| F490I     | 0.7164682794904339                 | F490L     | 0.4710684580090536                 |
| F490V     | 0.8009104298504651                 | F490Y     | 0.0291879840276975                 |
| F490S     | 0.45897874018982315                | F490C     | 0.7325504366615461                 |
| P491T     | -0.2649128858731087                | P491S     | -0.24026394511633162               |
| P491A     | 0.4395763144501575                 | P491H     | 0.047378986202032                  |
| P491L     | -0.0005777757613911333             | P491R     | -0.6860253986169476                |
| L492I     | -0.18665716467344717               | L492V     | -0.04971307375752051               |
| L492S     | 0.22976046200300954                | L492F     | -0.4080845089601123                |
| Q493K     | -0.97484240695699                  | Q493E     | -0.24334580754560667               |
| Q493L     | -0.9725222079360467                | Q493P     | -0.27323149929707297               |
| Q493R     | 0.3518296643914156                 | Q493H     | 1.6631979526213911                 |
| S494T     | -0.26806911311902015               | S494P     | -0.07361595624320341               |
| S494A     | 0.2627102190875382                 | S494L     | -0.19940692726541423               |
| Y495N     | 4.453774987734683                  | Y495H     | 2.4466347795920735                 |
| Y495D     | 1.8786153780192993                 | Y495F     | 0.6919540235247663                 |
| Y495S     | 1.0034240822960778                 | Y495C     | 1.33552728808187                   |
| G496S     | 0.2019433793738568                 | G496C     | 0.2274037817532474                 |
| G496R     | -1.170174391274189                 | G496D     | -0.01708362189732279               |
| G496V     | -0.23410778989332331               | G496A     | 0.5573101024172533                 |
| F497I     | 0.6540312025806432                 | F497L     | 0.4451156099963752                 |
| F497V     | 0.7984510604395286                 | F497Y     | -0.4183692917105818                |
| F497S     | 0.5768452217856271                 | F497C     | 0.9860015608722377                 |
| Q498K     | 0.20046963535114556                | Q498E     | 0.2880893730187563                 |
| Q498L     | 0.6068647733763773                 | Q498P     | 0.7080502809816315                 |
| Q498R     | 0.31213176861698605                | Q498H     | 0.3075009308129441                 |
| P499T     | -0.9779182460094088                | P499S     | -1.3202466447329324                |
| P499A     | 0.2494956167034609                 | P499H     | 0.556968909254117                  |

Continued on next page

**Table S4 – continued from previous page**

| Mutations | Binding affinity change (kcal/mol) | Mutations | Binding affinity change (kcal/mol) |
|-----------|------------------------------------|-----------|------------------------------------|
| P499L     | -0.3244921208380976                | P499R     | -0.34422969636317385               |
| T500S     | 0.3805817480249617                 | T500P     | 0.36518516870729967                |
| T500A     | 0.6583809018853561                 | T500N     | 2.944501459773469                  |
| T500I     | 0.28571380033589666                | N501Y     | 0.008176664020130066               |
| N501H     | -0.08542359330421585               | N501D     | 0.42096141744659227                |
| N501I     | 1.7229311882198899                 | N501T     | 1.3722144407101737                 |
| N501S     | 2.966011817655139                  | N501K     | -0.6360853190180881                |
| G502S     | -1.2346813284959972                | G502C     | -0.11554750486742946               |
| G502R     | -0.4051550086645717                | G502D     | -0.667464583711077                 |
| G502V     | -0.27848124775250716               | G502A     | -0.0523513087093224                |
| V503I     | -0.09670433755131967               | V503F     | 0.4270666688682674                 |
| V503L     | -0.010733078231622511              | V503D     | 0.11093319161472484                |
| V503A     | 0.6467291793922666                 | V503G     | 0.8600898722876078                 |
| G504S     | -0.4739125146741219                | G504C     | -0.41129994777452705               |
| G504R     | -0.5929758801964633                | G504D     | -0.08696046206079011               |
| G504V     | -0.5081452199197457                | G504A     | -0.4117025858597221                |
| Y505N     | 0.7916739870207682                 | Y505H     | 3.6221381612801915                 |
| Y505D     | 0.3971302979283701                 | Y505F     | -0.7968505426032857                |
| Y505S     | 0.4079157485460091                 | Y505C     | 1.7841209418873683                 |
| Q506K     | 1.1214773786190542                 | Q506E     | 0.3656442594434449                 |
| Q506L     | 0.2769013502198106                 | Q506P     | 1.04285168560247                   |
| Q506R     | 1.775941871399624                  | Q506H     | 0.4251664383407815                 |
| P507T     | -0.16318024273519066               | P507S     | 2.2922949551460583                 |
| P507A     | 0.31282764485386705                | P507Q     | -0.3025257103400314                |
| P507L     | -0.1120364991739683                | P507R     | 0.14145169831415755                |
| Y508N     | 0.437306184594462                  | Y508H     | -0.023952181216801642              |
| Y508D     | 0.4796602611426787                 | Y508F     | 0.23230748215884156                |
| Y508S     | -0.006673176371398153              | Y508C     | 0.4990722062528734                 |
| R509G     | 0.10188541497646948                | R509K     | 0.9256289235639065                 |
| R509I     | 0.20305156748554304                | R509T     | 0.3240056651772013                 |
| R509S     | -0.01831547844723258               | V510I     | -0.13593064079091863               |
| V510L     | -0.14634863230862322               | V510E     | -0.7387751800925344                |
| V510A     | 0.16452053119807175                | V510G     | 0.32172573663639403                |
| V511I     | -2.2510920118212363                | V511L     | -2.0950787589315065                |
| V511E     | 2.831479191867628                  | V511A     | -1.1925507333641474                |
| V511G     | -1.5911580742780629                | V512I     | 1.036511677907285                  |
| V512L     | 2.472822627526483                  | V512E     | 0.024318311192341072               |
| V512A     | 1.139630359275301                  | V512G     | 0.09242621943949597                |
| L513I     | -0.10092677159047522               | L513F     | -0.12602728050855594               |
| L513V     | 0.03463468441791892                | L513H     | -0.713508435951803                 |
| L513P     | 0.25765920190299707                | L513R     | -1.2326833403330606                |
| S514T     | 0.08766446124826124                | S514P     | 0.05220743935332478                |
| S514A     | 0.32856333210394384                | S514Y     | 0.3591133039019021                 |
| S514F     | 0.26519152016202746                | S514C     | 0.19735529194960516                |
| F515I     | 1.2666219832174044                 | F515L     | 1.1198179948395992                 |
| F515V     | 0.2770992309395645                 | F515Y     | -0.11263854527731199               |
| F515S     | 0.34375238622982485                | F515C     | 1.0371844608564067                 |
| E516K     | -0.32755279541191096               | E516Q     | -0.21610566306031723               |
| E516V     | 0.5926736063480301                 | E516A     | 0.04849950124257807                |
| E516G     | -1.1706930572590755                | E516D     | -0.4274415365895237                |

Continued on next page

**Table S4 – continued from previous page**

| Mutations | Binding affinity change (kcal/mol) | Mutations | Binding affinity change (kcal/mol) |
|-----------|------------------------------------|-----------|------------------------------------|
| L517I     | -0.1282350314195009                | L517F     | -0.30684147771872816               |
| L517V     | 0.12704886077841826                | L517H     | 0.12040000162369732                |
| L517P     | 0.0440364520758754                 | L517R     | -0.28366872341894295               |
| L518I     | 0.35440129898514744                | L518V     | 0.2805610839464838                 |
| L518Q     | 0.03716100506441392                | L518P     | 0.24504939332275555                |
| L518R     | -0.08059421627099501               | H519N     | 0.1269627398055571                 |
| H519Y     | 0.15046252528638093                | H519D     | -0.09072981539589503               |
| H519L     | 0.25509585379189137                | H519P     | 0.2686150578693283                 |
| H519R     | 0.10425945034599789                | H519Q     | 0.18831800846532457                |
| A520T     | 0.08731837064404224                | A520S     | 0.07095201002836367                |
| A520P     | 0.4041100589290541                 | A520E     | 0.10247910835890303                |
| A520V     | 0.1992627874631823                 | A520G     | 0.34537344632494915                |
| P521T     | 0.03808988518735238                | P521S     | 0.04880487875248997                |
| P521A     | 0.20961511697987714                | P521Q     | 0.17842919736990703                |
| P521L     | 0.2308306213205773                 | P521R     | -0.0065610031087648514             |
| A522T     | 0.030669113099624352               | A522S     | 0.1404360895874541                 |
| A522P     | 0.17596900810252228                | A522E     | 0.045908464072034416               |
| A522V     | 0.17323086302755886                | A522G     | 0.28043749784783417                |
| T523S     | 0.2955248243124004                 | T523P     | 0.5907045155284703                 |
| T523A     | 0.6332250314527801                 | T523N     | 0.6962472281778261                 |
| T523I     | 0.7491367607812094                 | V524I     | -0.26808077480250875               |
| V524F     | -0.13643569796174218               | V524L     | 0.8830277962856353                 |
| V524D     | 1.0003694379810084                 | V524A     | 1.3857184060847776                 |
| V524G     | 1.3389330525980532                 | C525S     | 0.6864321828805163                 |
| C525R     | 0.5410401888358585                 | C525G     | 0.6016343181815996                 |
| C525Y     | 0.3709288086712334                 | C525F     | 0.403863269097925                  |
| C525W     | 0.2197903008792516                 | G526R     | -1.1884795266533699                |
| G526E     | -0.3816521392053786                | G526V     | -2.945790087503917                 |
| G526A     | 0.188441869182812                  |           |                                    |

Table S5: Likely mutation binding affinity change prediction. Residue ID is according to SARS-CoV-2.

| Mutations | Binding affinity change (kcal/mol) | Mutations | Binding affinity change (kcal/mol) |
|-----------|------------------------------------|-----------|------------------------------------|
| T333L     | 0.36711414198162123                | T333Q     | 0.2944171016528851                 |
| T333E     | 0.28351593033661665                | T333V     | 0.34837438687921685                |
| T333G     | 0.4200215149946123                 | T333N     | 0.20992592285458667                |
| T333M     | 0.2047272635752992                 | N334F     | 0.08471263263309878                |
| N334C     | -0.3744686921975172                | N334L     | -0.25743991480502126               |
| N334P     | 0.5870933293317209                 | N334R     | -0.019984080717318824              |
| N334V     | 0.4606882935368657                 | N334A     | -0.22205901791083096               |
| N334G     | 0.04978463996692858                | N334Q     | -0.15264867556794223               |
| N334E     | 1.0032145233553824                 | N334M     | 0.6470893703083734                 |
| L335K     | -0.21409984794776654               | L335T     | -0.4280108273635263                |
| L335R     | -2.631891479662934                 | L335Q     | 0.5502134889673533                 |
| L335P     | 0.3873026733750947                 | L335E     | -0.13217396543541343               |
| L335A     | 0.2320214165841903                 | L335G     | 0.18315829086127428                |
| L335I     | 0.2501163595268764                 | L335Y     | -0.4605089193686703                |
| L335C     | 0.10340261769853434                | C336N     | 0.35858070811654985                |
| C336I     | 0.2878398970645796                 | C336T     | -0.09713307826975079               |

Continued on next page

Table S5 – continued from previous page

| Mutations | Binding affinity change (kcal/mol) | Mutations | Binding affinity change (kcal/mol) |
|-----------|------------------------------------|-----------|------------------------------------|
| C336H     | -0.016387495510664256              | C336L     | 0.001790501926396615               |
| C336P     | 0.3921826367800033                 | C336D     | -0.34909778761533894               |
| C336V     | 0.24715082243452438                | C336A     | 0.41770720684747686                |
| P337N     | 0.18638306097231022                | P337I     | -0.006678173981198654              |
| P337Y     | 0.07623953301123451                | P337F     | 0.19922467342170974                |
| P337C     | 0.14177558536959894                | P337D     | 0.14090285993209145                |
| P337V     | 0.2528880124442296                 | P337G     | 0.3126738024368957                 |
| P337Q     | 0.2006123221089957                 | F338N     | 0.27159958939300044                |
| F338T     | 0.3284332902084772                 | F338H     | 1.0090342180442964                 |
| F338P     | 1.4808660776302902                 | F338R     | 0.22845080279336835                |
| F338D     | 0.8620473427019798                 | F338A     | 2.7142282011047842                 |
| F338G     | 1.4811459408348466                 | F338M     | 0.9029404872897693                 |
| F338W     | 1.0052043818251883                 | G339N     | 0.3512248326079045                 |
| G339I     | 0.3818760655998165                 | G339T     | 0.2024571534332734                 |
| G339Y     | 0.31277736027454955                | G339F     | -0.30451281142007336               |
| G339H     | 0.4369420944664961                 | G339L     | 0.32339624004836953                |
| G339P     | 0.20783078761973434                | G339W     | 0.2513234110088286                 |
| G339E     | 0.3252278488226295                 | E340I     | -0.26708364745659086               |
| E340T     | 0.0552334017490184                 | E340R     | -0.010451199409254115              |
| E340L     | 0.004955078249118843               | E340S     | 0.1259073032881047                 |
| E340P     | 0.22364344602241698                | E340N     | -0.0212562442944646                |
| E340Y     | -0.032255356259882295              | E340H     | 0.05169659224259826                |
| V341N     | -1.762240554169106                 | V341T     | -0.10105597956043533               |
| V341S     | 0.47590787259905837                | V341Y     | -0.32051725428702715               |
| V341C     | 0.637745043517461                  | V341H     | -0.41868727177360665               |
| V341P     | 0.4039030950889                    | V341R     | -0.03581812496550252               |
| V341M     | 0.3286853435552745                 | V341E     | -0.24018586584771823               |
| F342N     | 0.07999343083076557                | F342T     | 1.18760555702351                   |
| F342H     | 2.3292436191051413                 | F342P     | 1.6263873472878327                 |
| F342R     | 1.1171950413236038                 | F342D     | 1.1305604733681414                 |
| F342A     | 1.5547464037859968                 | F342G     | 1.218270347851369                  |
| F342M     | 1.387407400094697                  | F342W     | 1.2375068398441043                 |
| N343F     | -1.5440348565494904                | N343C     | -0.2808647919427268                |
| N343L     | -0.007702556100912364              | N343P     | 0.09452918391061718                |
| N343R     | -1.7642367649485837                | N343V     | 0.08653837992920141                |
| N343A     | -0.14653928282582443               | N343G     | -0.1655326425378049                |
| N343Q     | -0.0007961745475319401             | N343E     | 0.07384303883519008                |
| N343M     | -1.4134982200046702                | A344N     | 0.10493544637706109                |
| A344I     | -0.16131085695362932               | A344Y     | -0.0017085347946742032             |
| A344F     | -0.013750711534165983              | A344C     | 0.06975247176684352                |
| A344H     | -0.15908765792247065               | A344L     | 0.008370849804871551               |
| A344R     | -1.3545105738596175                | A344E     | -0.13847045262457083               |
| T345Y     | 0.045312075817320815               | T345F     | 0.20421585439426168                |
| T345C     | 0.03429697659932192                | T345H     | -1.1481157510756002                |
| T345L     | 0.19486303862323665                | T345R     | 0.18142634750141753                |
| T345D     | -0.005191711175726464              | T345V     | 0.1838564083652279                 |
| T345G     | 0.12842052884802702                | T345K     | 0.08401192592745524                |
| T345M     | 0.06345609921634535                | R346L     | 0.11821028096106408                |
| R346Q     | 0.23057827727717645                | R346P     | 0.5895698207658844                 |
| R346E     | 0.5028308480186643                 | R346V     | 0.4229749393322442                 |

Continued on next page

**Table S5 – continued from previous page**

| Mutations | Binding affinity change (kcal/mol) | Mutations | Binding affinity change (kcal/mol) |
|-----------|------------------------------------|-----------|------------------------------------|
| R346A     | 0.5633235286579769                 | R346C     | 0.4048595206495622                 |
| R346W     | -0.11462741832232785               | R346N     | 0.08125550136025614                |
| R346M     | 0.525245398006787                  | F347N     | 3.3659591398651374                 |
| F347T     | 2.3126586286148942                 | F347H     | 0.7568208114383773                 |
| F347P     | 0.7288790200039444                 | F347R     | 1.9260333989966152                 |
| F347D     | -0.2412981889808834                | F347A     | 0.805163099568303                  |
| F347G     | 0.6935799311290428                 | F347M     | 0.36330410094485577                |
| F347W     | 1.079343262329541                  | A348K     | -0.2768866919242218                |
| A348I     | -0.1420690866206204                | A348R     | -0.2833959247465061                |
| A348L     | -0.04503022152499691               | A348Q     | -0.06261955359362867               |
| A348D     | 0.4288603005397379                 | S349N     | -0.12517905506730445               |
| S349I     | 0.024756537141285107               | S349H     | 0.06535686953607892                |
| S349L     | -0.10336593821467358               | S349R     | 1.915859791157807                  |
| S349D     | 0.23877093964721804                | S349V     | 0.3387902565246805                 |
| S349G     | 0.3167224532588867                 | S349W     | 0.2514751363613729                 |
| V350N     | 0.7198773327234307                 | V350T     | 0.13067390125499145                |
| V350S     | -0.007410970940766222              | V350Y     | -0.894519764298274                 |
| V350C     | 0.45250068048615455                | V350H     | -0.20477890514960878               |
| V350P     | 0.42736664831097143                | V350R     | 0.0010065105681489079              |
| V350M     | -0.06806747585364817               | V350E     | 0.8152818338624384                 |
| Y351I     | -0.07728400426328888               | Y351T     | -0.6451325204814776                |
| Y351L     | 0.6124206314367939                 | Y351P     | 0.7149403204301136                 |
| Y351R     | 0.5226585459688343                 | Y351V     | 1.3954029373722203                 |
| Y351A     | 1.467384477596199                  | Y351G     | 2.398114458122118                  |
| Y351K     | 0.868199933610153                  | Y351Q     | -0.9066264093551112                |
| Y351E     | 0.8951935821794359                 | Y351W     | 0.3046234713642753                 |
| A352N     | -0.26137514247455435               | A352I     | -0.11699884734452407               |
| A352Y     | -0.08544094538991999               | A352F     | -0.042987815366750996              |
| A352C     | -0.030498358045014946              | A352H     | -0.12235030690459588               |
| A352L     | -0.1585805971586019                | A352R     | -0.3663617917754086                |
| A352E     | -0.30872632139307593               | W353K     | -0.27869601862125126               |
| W353M     | 0.2610964202645987                 | W353T     | -0.18136857474669751               |
| W353Q     | -0.6924449491453935                | W353P     | -0.009966331762967257              |
| W353E     | -0.5181433036289946                | W353V     | -0.4989760892354373                |
| W353A     | 0.2629626505080159                 | W353Y     | 0.2602646822642389                 |
| W353F     | 0.33967832602971104                | N354F     | 0.5668450059138468                 |
| N354C     | 0.7127403702938417                 | N354L     | 0.5543526394141532                 |
| N354P     | 0.5094752172655629                 | N354R     | -0.3184471829082041                |
| N354V     | 0.30974559649156247                | N354A     | 0.8315892569874566                 |
| N354G     | 0.42021723483780227                | N354Q     | 0.3798271739036113                 |
| N354E     | 0.27658423840802626                | N354M     | 0.5483120352358831                 |
| R355L     | 0.2937271622494081                 | R355Q     | 0.6052446548834985                 |
| R355P     | 1.104998752538954                  | R355E     | 0.20950715933054748                |
| R355V     | -0.9344901675362364                | R355A     | 0.321457401654143                  |
| R355C     | 0.11984944123123609                | R355N     | 0.31454074731720827                |
| R355I     | 0.4814205470436443                 | K356L     | 0.048319187762920414               |
| K356S     | 0.05219484552291052                | K356W     | -0.24519358348250836               |
| K356P     | -0.5594395000881911                | K356V     | -1.8854985378763824                |
| K356A     | 0.23647942213205328                | K356G     | 0.1627771375511085                 |
| K356Y     | 1.1674597969066502                 | K356H     | 0.654842973900289                  |

Continued on next page

**Table S5 – continued from previous page**

| Mutations | Binding affinity change (kcal/mol) | Mutations | Binding affinity change (kcal/mol) |
|-----------|------------------------------------|-----------|------------------------------------|
| K356D     | -1.0544765246909726                | K356I     | -0.0628644202124165                |
| R357L     | 2.063566026379174                  | R357Q     | 1.6238627643773296                 |
| R357P     | 0.4913206103268283                 | R357E     | 0.19430390942422224                |
| R357V     | 0.18745386091721655                | R357A     | 0.4163270261966048                 |
| R357C     | 0.43142767278227756                | R357W     | 0.3507749452761727                 |
| R357N     | 0.7196512596754386                 | R357M     | 0.38257961788424677                |
| I358Y     | -0.12744534484049427               | I358C     | 0.40937438765814027                |
| I358H     | -0.37307415003233413               | I358P     | 0.38156930141887824                |
| I358R     | -1.6266718104886688                | I358D     | 0.20812395760329205                |
| I358A     | 0.46451435831352417                | I358G     | 0.35184671400192397                |
| I358K     | -0.10067979984982647               | S359Y     | 0.22521652000795997                |
| S359F     | 0.4454893292825813                 | S359H     | 0.4754579276249077                 |
| S359L     | 0.6523853610767139                 | S359P     | 0.37840937502204375                |
| S359D     | 0.127135726495169                  | S359V     | 0.8315761887986384                 |
| S359A     | 0.6001893930486933                 | S359W     | 0.7222216310569651                 |
| S359K     | 0.11009060527968731                | S359M     | 0.657230660236167                  |
| N360F     | 0.24650612948776568                | N360C     | 0.13891629196399394                |
| N360L     | 0.30310358183415176                | N360P     | 0.17030895405383709                |
| N360R     | 0.15324912449981548                | N360V     | 0.17429722146033977                |
| N360A     | 0.235531589300487                  | N360G     | 0.13748643891431053                |
| N360Q     | 0.17689077533067088                | N360E     | 0.20573841627079106                |
| N360M     | 0.12365214437123953                | C361N     | 0.3451692465332896                 |
| C361I     | 0.08739991032141944                | C361T     | 0.4038713708874105                 |
| C361H     | 0.252574619759458                  | C361L     | 0.390864832419348                  |
| C361P     | 0.31684416842683477                | C361D     | 0.2273942728424409                 |
| C361V     | 0.42097317661245165                | C361A     | 0.5073071964087812                 |
| V362N     | 0.04792689107690225                | V362T     | 0.24210019238230923                |
| V362S     | 0.2477500197529751                 | V362Y     | -0.016920542631958878              |
| V362C     | 0.19260135731562095                | V362H     | 0.10561397394764638                |
| V362P     | 0.29524634736216465                | V362R     | 0.2142038847746086                 |
| V362M     | 0.23904148086599575                | V362E     | 0.1794905832805453                 |
| A363N     | 0.0023582561752718803              | A363I     | 1.5128967355404839                 |
| A363Y     | -0.8441517938941686                | A363F     | 1.579958094830846                  |
| A363C     | -0.005753210198915401              | A363H     | -2.1290953318644252                |
| A363L     | 0.19217149279145115                | A363R     | -1.1421856841672997                |
| A363E     | 0.1676420675220488                 | D364I     | 0.04560848359805036                |
| D364T     | 0.11282656905428763                | D364S     | 0.24261822895221888                |
| D364F     | 0.03449843379832905                | D364C     | 0.26809229570194343                |
| D364L     | 0.17438506444471852                | D364P     | 0.20005691248717722                |
| D364R     | 0.2529588012200351                 | D364K     | 0.20537273776639703                |
| D364Q     | 0.22483180318374316                | Y365I     | 3.2906441389630197                 |
| Y365T     | 1.238153334343976                  | Y365L     | 0.14557991138089715                |
| Y365P     | 0.2820539996149506                 | Y365R     | 0.16412504258395605                |
| Y365V     | 3.5381084956531574                 | Y365A     | 0.7157301803486937                 |
| Y365G     | 1.49187266192086                   | Y365K     | 0.04175873611292048                |
| Y365Q     | 0.12093597839500995                | Y365E     | 0.4258973068411137                 |
| Y365W     | -1.1308332909116077                | S366N     | -1.614318883368572                 |
| S366I     | -0.11185755349496769               | S366H     | -0.10897746489970939               |
| S366L     | 0.10826519458738755                | S366R     | 0.07319710734438589                |
| S366D     | -1.8351416373449023                | S366V     | 0.06405130288196767                |

Continued on next page



Table S5 – continued from previous page

| Mutations | Binding affinity change (kcal/mol) | Mutations | Binding affinity change (kcal/mol) |
|-----------|------------------------------------|-----------|------------------------------------|
| S366G     | 0.08170544756353378                | S366W     | 0.26840064056217283                |
| V367N     | -0.20035631137103477               | V367T     | -0.056539335499473174              |
| V367S     | -0.6375746846307413                | V367Y     | 0.4328293690480646                 |
| V367C     | 0.6149771518213828                 | V367H     | 1.187711785712945                  |
| V367P     | 0.6840540613142467                 | V367R     | -0.26397196317196847               |
| V367M     | 0.5667510569079531                 | V367E     | 0.01827309630949744                |
| L368K     | 1.2259728977315638                 | L368T     | 0.7465482394622804                 |
| L368S     | 1.928870752067938                  | L368E     | 2.422665322962998                  |
| L368A     | 2.041267027039175                  | L368G     | 0.8894732803981503                 |
| L368M     | 0.3615223954972203                 | L368F     | 0.33939002097710463                |
| L368H     | 1.978737480597228                  | Y369I     | -1.5794177500806952                |
| Y369T     | -0.07243948959704012               | Y369L     | -1.3688494779776623                |
| Y369P     | -1.2846539506231591                | Y369R     | -1.5193214710564762                |
| Y369V     | -1.3842162268630052                | Y369A     | 0.05373785436355424                |
| Y369G     | -1.0788739144796842                | Y369K     | -1.7564382262713074                |
| Y369Q     | -0.25663218280014377               | Y369E     | -0.09957193588429683               |
| Y369W     | 0.3038512028714467                 | N370F     | -2.9377948556343747                |
| N370C     | 0.003612554766990844               | N370L     | 0.2618965874639211                 |
| N370P     | 0.4393211918473335                 | N370R     | -0.35381471754400184               |
| N370V     | 0.2230687310263328                 | N370A     | 0.18106294814004947                |
| N370G     | -0.09312546532263884               | N370Q     | -2.9629449775376195                |
| N370E     | 0.23051889894389282                | N370M     | 0.07902576526789752                |
| S371N     | -0.9343050091030746                | S371I     | -1.6022680226392239                |
| S371H     | -2.858379060454566                 | S371L     | -2.329377596782451                 |
| S371R     | -1.2171158702951403                | S371D     | -1.492107218935479                 |
| S371V     | -2.245868541805055                 | S371G     | -2.279953315203346                 |
| S371W     | -0.04061130054973855               | A372K     | 0.10705247229093966                |
| A372I     | 0.2169170650570252                 | A372R     | -0.13970131906334013               |
| A372L     | 0.16455524867689614                | A372Q     | 0.13286375649567672                |
| A372D     | -0.06955371713617137               | S373K     | -0.42980197925189667               |
| S373I     | -0.5019702029578088                | S373R     | -1.0123111805889797                |
| S373Q     | 0.34791187036362264                | S373E     | 0.3389620001361424                 |
| S373V     | -0.10150728830920148               | S373G     | -0.37930219405877436               |
| S373Y     | -0.4743020716664169                | S373F     | 0.2437893845371919                 |
| S373C     | -0.4394473826993325                | S373W     | 0.19784726665159313                |
| F374N     | 0.16255413937956475                | F374T     | -0.19609681374786644               |
| F374H     | 0.17518555529507315                | F374P     | 0.556559880323588                  |
| F374R     | -0.13470417320861852               | F374D     | 0.11701899796193241                |
| F374A     | 0.3901347671112269                 | F374G     | 0.10539132378805446                |
| F374M     | 0.17965950417952625                | F374W     | 0.12421747745237022                |
| S375N     | 0.0905319837257881                 | S375I     | 0.08003754463318445                |
| S375H     | 0.010714323227297743               | S375L     | -0.050998752103090336              |
| S375R     | -0.5653792633470671                | S375D     | -0.18201590400066978               |
| S375V     | 0.25161770245145954                | S375G     | 0.10079457201543078                |
| S375W     | -0.8078741565551079                | T376Y     | -0.1382730915311325                |
| T376F     | 0.1091628623588163                 | T376C     | 0.4168619677447419                 |
| T376H     | -0.09290789852360903               | T376L     | -0.03764069131861294               |
| T376R     | -1.4843507371762332                | T376D     | -1.879984502599011                 |
| T376V     | 0.41284397187841576                | T376G     | 1.1942837672143607                 |
| T376K     | -0.704289073305508                 | T376M     | -0.11370086153235288               |

Continued on next page

Table S5 – continued from previous page

| Mutations | Binding affinity change (kcal/mol) | Mutations | Binding affinity change (kcal/mol) |
|-----------|------------------------------------|-----------|------------------------------------|
| F377N     | 0.5363113768259671                 | F377T     | 0.18266038724904632                |
| F377H     | 0.18351147894661293                | F377P     | 0.7707575319448396                 |
| F377R     | -0.7093971982385915                | F377D     | -1.342485057005301                 |
| F377A     | 0.7731298739362428                 | F377G     | 0.4977609823788218                 |
| F377M     | 0.316477706682566                  | F377W     | -0.41138701181959964               |
| K378L     | 0.2775431717302423                 | K378S     | 0.37076695017618644                |
| K378W     | 0.3262691912467635                 | K378P     | 0.1575365271522551                 |
| K378V     | 0.6142796170320284                 | K378A     | 0.6067990364981375                 |
| K378G     | 0.21955949784566603                | K378Y     | 0.18617762335365404                |
| K378H     | 0.5556674763191841                 | K378D     | 0.32531612497554574                |
| K378I     | 0.39095664112502526                | C379N     | 0.26203488670597597                |
| C379I     | 0.28540659131236124                | C379T     | 0.03411912668418713                |
| C379H     | 0.2532045111227837                 | C379L     | 0.0791019050621764                 |
| C379P     | 0.3242688650047029                 | C379D     | 0.08501288281543591                |
| C379V     | 0.12073705752272335                | C379A     | 0.39213241754872064                |
| Y380I     | 0.42453280743339306                | Y380T     | 0.5964018355588967                 |
| Y380L     | 0.4438200332412956                 | Y380P     | 0.5742820683101126                 |
| Y380R     | 0.26588322724819347                | Y380V     | 0.40523111202577045                |
| Y380A     | 0.5242989088298531                 | Y380G     | 0.24552725381814247                |
| Y380K     | -1.293737214309824                 | Y380Q     | 0.34416982323274165                |
| Y380E     | 0.6158052984271805                 | Y380W     | 0.16877334473617783                |
| G381K     | -1.603327217040905                 | G381I     | -1.1941568481071239                |
| G381T     | 0.048026332217306525               | G381L     | 0.20801372993943165                |
| G381S     | 0.4335696208027544                 | G381Q     | -1.3524537069405813                |
| G381P     | 0.30112669262485514                | G381C     | 0.4079474522058254                 |
| G381W     | -3.3836696099724124                | G381D     | -3.0418201551252335                |
| V382K     | 1.4128627814879342                 | V382T     | -0.04647164063699464               |
| V382R     | 1.0942130014420548                 | V382S     | -0.3310844023799896                |
| V382W     | 0.04398783211826964                | V382Q     | -0.22168078161448257               |
| V382P     | 0.15599957157037098                | V382I     | 0.16607479448652313                |
| V382F     | 0.19244766627531235                | V382D     | -0.1325257653237396                |
| S383N     | 0.23340723437903707                | S383I     | 0.42931039008897687                |
| S383H     | 0.3295039029482738                 | S383L     | 0.38912806769789016                |
| S383R     | 0.2796307387628073                 | S383D     | 0.046609328942757315               |
| S383V     | 0.4006471203566436                 | S383G     | 0.2590632182890112                 |
| S383W     | 0.43236683491968986                | P384N     | 1.0468671275077823                 |
| P384I     | -0.04322799740848164               | P384Y     | 0.047530603833653866               |
| P384F     | 0.34749703208104277                | P384C     | 0.1660545925472359                 |
| P384D     | -0.3688922918801786                | P384V     | 0.08384833306671362                |
| P384G     | 0.09689552417675648                | P384Q     | -0.1450143640858802                |
| T385Y     | 0.03258417388726313                | T385F     | -0.07166427601316541               |
| T385C     | 0.16753305783204422                | T385H     | 0.10786022289470656                |
| T385L     | 0.2220367811733658                 | T385R     | 0.24990324352100712                |
| T385D     | 0.09166821514646209                | T385V     | 0.23615107792427223                |
| T385G     | 0.055270300676494945               | T385K     | 0.13621124990978578                |
| T385M     | 0.24999595084520276                | K386L     | 0.05933355101853387                |
| K386S     | 0.16424412334784716                | K386P     | 0.33954919829447056                |
| K386V     | 0.0991633865508944                 | K386A     | 0.1734919498981415                 |
| K386G     | 0.09676479053715134                | K386Y     | -0.013545069219757708              |
| K386H     | 0.09245373405899901                | K386D     | -0.08060142469500406               |

Continued on next page

Table S5 – continued from previous page

| Mutations | Binding affinity change (kcal/mol) | Mutations | Binding affinity change (kcal/mol) |
|-----------|------------------------------------|-----------|------------------------------------|
| K386M     | 0.05241577650599825                | L387K     | -0.21566013283485566               |
| L387T     | 0.14711311633997778                | L387R     | -0.3954138722747453                |
| L387Q     | -0.4318732903677759                | L387P     | 0.6349905817293126                 |
| L387E     | -0.0359902917517348                | L387A     | 0.666340553197047                  |
| L387G     | 0.3601300362699994                 | L387M     | -0.013129214865123634              |
| L387Y     | -0.47670849797807335               | L387C     | 0.5265411101009095                 |
| L387W     | -0.5661921080465366                | N388F     | 0.25297606685106666                |
| N388C     | 0.5134625181245619                 | N388L     | 0.3564982774342179                 |
| N388P     | 0.5724372525686129                 | N388R     | -0.07831466579523666               |
| N388V     | 0.2439705569905458                 | N388A     | 0.5100123923797002                 |
| N388G     | 0.10359090224149643                | N388Q     | 0.008054367209907192               |
| N388E     | 0.0073448742643349215              | N388M     | 0.4915127453142455                 |
| D389I     | 0.10378599037057981                | D389T     | -0.01954165411051952               |
| D389S     | 1.076498177726712                  | D389F     | -0.06256576148145011               |
| D389C     | -0.5009123199307111                | D389L     | 0.028244989988776455               |
| D389P     | 0.1517932456622885                 | D389R     | 0.0911521316426411                 |
| D389K     | 0.003581327447950258               | D389Q     | 0.15420527556418379                |
| L390N     | 0.04748868030337227                | L390T     | 0.1303675903683367                 |
| L390S     | 0.2710854015489026                 | L390Y     | 0.09492618590974496                |
| L390C     | 0.35966755529686323                | L390D     | 0.16253239353843568                |
| L390A     | 0.3577712513249426                 | L390G     | 0.2758142419923063                 |
| L390M     | 0.24001630123801404                | L390Q     | 0.17969487199865022                |
| C391N     | 0.4807214819223919                 | C391I     | 0.5246545765977824                 |
| C391T     | 0.5370674235488887                 | C391H     | 0.515671848016521                  |
| C391L     | 0.5399853009796496                 | C391P     | 0.7033035184023753                 |
| C391D     | 0.38723810154019983                | C391V     | 0.5791830683922817                 |
| C391A     | 0.6716721490757671                 | F392N     | -0.03274042201887174               |
| F392T     | -1.3487832189356703                | F392H     | -0.2038243964373423                |
| F392P     | 0.2740360207554921                 | F392R     | -0.16011323189521615               |
| F392D     | -1.237495802944048                 | F392A     | 0.4005315995971001                 |
| F392G     | 0.24375112619262493                | F392M     | 0.2575505583150949                 |
| F392W     | -0.3010403839023437                | T393Y     | 0.3316587981425056                 |
| T393F     | 0.26896096244236256                | T393C     | 0.26014118140747283                |
| T393H     | 0.14068484598313793                | T393L     | 0.2861317585412183                 |
| T393R     | 0.184552213178305                  | T393D     | 0.18271120809328206                |
| T393V     | 0.2457116864128103                 | T393G     | 0.1938437647400993                 |
| T393K     | 0.00044598605949665684             | T393M     | 0.31050962743624033                |
| N394F     | 0.3246936398477954                 | N394C     | 0.18842143785062282                |
| N394L     | 0.2307211072132782                 | N394P     | 0.3708516930088857                 |
| N394R     | 0.24838255419122518                | N394V     | 0.08895686612481304                |
| N394A     | 0.15227157065999036                | N394G     | -0.03336859584521647               |
| N394Q     | 0.13972500856122988                | N394E     | -0.02318075938663813               |
| N394M     | 0.497519578550611                  | V395N     | -0.546593125595327                 |
| V395T     | -0.3010429326472537                | V395S     | -0.06704173475405308               |
| V395Y     | -0.35061604703584404               | V395C     | 0.027721561735848783               |
| V395H     | -0.4052687859903587                | V395P     | 0.056415762294375005               |
| V395R     | -0.7016374478447218                | V395M     | -0.6320836909832158                |
| V395E     | -0.1830500395364248                | Y396I     | 0.22888310462050043                |
| Y396T     | -0.02070472935614384               | Y396L     | 0.21813399388409732                |
| Y396P     | 0.3019625865624341                 | Y396R     | 0.02549940799243743                |

Continued on next page

Table S5 – continued from previous page

| Mutations | Binding affinity change (kcal/mol) | Mutations | Binding affinity change (kcal/mol) |
|-----------|------------------------------------|-----------|------------------------------------|
| Y396V     | 0.2739871091371279                 | Y396A     | 0.33223064334965546                |
| Y396G     | 0.2066469897702424                 | Y396K     | 0.08379458772790205                |
| Y396Q     | -0.042728170339307966              | Y396E     | 0.25796086929868334                |
| Y396W     | -0.1406297396568322                | A397K     | -0.2142978766624423                |
| A397I     | -0.2005475219434813                | A397R     | -0.8094328682995954                |
| A397L     | 0.005304654435396482               | A397Q     | 0.33967299248906735                |
| A397D     | -0.1318943389719577                | D398I     | 0.2821957184318705                 |
| D398T     | 0.7082060237308619                 | D398S     | 0.8533383762396172                 |
| D398F     | 0.04799193353080398                | D398C     | 0.7507143620654653                 |
| D398L     | -0.47308136365007936               | D398P     | 0.5492751123360909                 |
| D398R     | -1.115139921847215                 | D398K     | 1.4717080148523634                 |
| D398Q     | -0.743963950033501                 | S399K     | 0.2532052027649542                 |
| S399I     | 0.2516578851907669                 | S399R     | -0.4565155731364288                |
| S399Q     | -0.07437091565631876               | S399E     | -0.09408612361942384               |
| S399V     | 0.1325205850880716                 | S399G     | -2.871424376547335                 |
| S399Y     | 0.38894986579443563                | S399F     | 0.38271440215885455                |
| S399C     | 0.48817881482477044                | S399W     | 0.057210490540511125               |
| F400N     | -0.04939502049637009               | F400T     | 0.6617110772380672                 |
| F400H     | 0.6622249795672912                 | F400P     | 0.6129458750611678                 |
| F400R     | 0.5956437864327319                 | F400D     | -0.15205100477678513               |
| F400A     | 3.6191692973208482                 | F400G     | 3.0476062266887287                 |
| F400M     | 0.18184042604949396                | F400W     | 2.067491857548174                  |
| V401K     | -1.2511462305162322                | V401T     | 3.144388863919312                  |
| V401R     | -1.4825399676449025                | V401S     | 2.459818561397605                  |
| V401Q     | -0.9818525239084727                | V401P     | 0.05759446172693694                |
| V401M     | -0.6400340452304389                | V401F     | 0.7339736200537483                 |
| V401D     | 1.0196847698745455                 | I402Y     | -0.8520088868903498                |
| I402C     | 0.05616806642303944                | I402H     | 2.6410462229974216                 |
| I402P     | 0.2502190910811251                 | I402R     | -1.2697003617815903                |
| I402D     | -0.008894851260239377              | I402A     | -0.0001637674057261805             |
| I402G     | 0.6632078355821877                 | I402K     | -0.7126556646958366                |
| R403L     | -0.6917311096656378                | R403Q     | 0.46518123185190347                |
| R403P     | -2.0803238688545633                | R403E     | 0.1702922339097655                 |
| R403V     | 0.6190862144527081                 | R403A     | 0.8691513530797105                 |
| R403C     | 0.635035720555665                  | R403W     | -3.6351771021026296                |
| R403N     | 0.7594105797082162                 | R403M     | 0.20358841026659982                |
| G404N     | 0.6801921887243768                 | G404I     | -0.32788482492972565               |
| G404T     | -0.4794249080170082                | G404Y     | -2.2558272495526146                |
| G404F     | -1.0763419741728002                | G404H     | -0.5066970971991213                |
| G404L     | -0.5382449353583101                | G404P     | 0.49707882436018413                |
| G404W     | -1.231239926850856                 | G404E     | -0.6528987886086559                |
| D405I     | -0.10124515031112466               | D405T     | 0.06829908231465184                |
| D405S     | 0.3685584813814407                 | D405F     | -0.5841092823720216                |
| D405C     | 0.6263735917404539                 | D405L     | 0.08030724094695142                |
| D405P     | 0.9273600687243052                 | D405R     | 0.06282519746473539                |
| D405K     | 2.1044031164586223                 | D405Q     | 2.056157101292315                  |
| E406I     | -2.871146110373879                 | E406T     | -1.7709061724440265                |
| E406R     | -0.2093971129452279                | E406L     | -2.0802967802652486                |
| E406S     | 0.29876677866557755                | E406P     | -0.4417757780514372                |
| E406N     | 0.01244914377416088                | E406Y     | -3.4581507055668133                |

Continued on next page

Table S5 – continued from previous page

| Mutations | Binding affinity change (kcal/mol) | Mutations | Binding affinity change (kcal/mol) |
|-----------|------------------------------------|-----------|------------------------------------|
| E406H     | 1.101899992558512                  | V407N     | -0.9326793819209843                |
| V407T     | -0.19510493479079888               | V407S     | -0.15953522869953832               |
| V407Y     | 0.20469432779947067                | V407C     | 0.6224618612016871                 |
| V407H     | 0.1564088785593663                 | V407P     | 0.3708677777988083                 |
| V407R     | 0.09416341966425026                | V407M     | 0.3863822149776886                 |
| V407E     | 0.2298906118513957                 | R408L     | 1.4696735416498994                 |
| R408Q     | 0.7849054048285239                 | R408P     | 0.7939893217449854                 |
| R408E     | 0.7236194083117512                 | R408V     | 0.7855563483199162                 |
| R408A     | 0.7282456390777868                 | R408C     | 0.6587637088173424                 |
| R408W     | 0.5761068251134869                 | R408N     | 1.993950933864261                  |
| R408M     | 0.3789366796365958                 | Q409I     | 0.42515396031292185                |
| Q409T     | 0.6026036292008043                 | Q409S     | 0.5352149373164716                 |
| Q409V     | 0.5637825989848647                 | Q409A     | 0.7744141503180748                 |
| Q409G     | 0.521821347933815                  | Q409N     | 0.9439512844681064                 |
| Q409Y     | -0.08809370765442001               | Q409D     | 0.6182431909403584                 |
| I410Y     | -1.153118937018789                 | I410C     | 1.375822163591144                  |
| I410H     | -0.9616957211683831                | I410P     | 2.005492776925252                  |
| I410R     | -0.7643389916399055                | I410D     | 1.3955663093607573                 |
| I410A     | 1.3600583753262312                 | I410G     | 2.4301332610499355                 |
| I410K     | -0.13846878976687585               | A411N     | -0.025646106602062034              |
| A411I     | 0.0076124898795057435              | A411Y     | -1.6517258422061467                |
| A411F     | -0.640508486588075                 | A411C     | -0.297097003572724                 |
| A411H     | 0.10436741812492609                | A411L     | -0.2835242488072584                |
| A411R     | -0.7463357816817018                | A411E     | 0.9268074333633181                 |
| P412K     | 0.08535445251560311                | P412I     | 0.04400363911516468                |
| P412E     | 0.6687032415764695                 | P412V     | 0.1827072511015025                 |
| P412G     | -0.12081964396864353               | P412H     | -0.06984887888197668               |
| G413K     | 0.4113969171737234                 | G413M     | 0.18478008405349017                |
| G413T     | -0.4007435950146269                | G413L     | 0.4039071442987203                 |
| G413S     | 0.26540599018757643                | G413Q     | 0.2909147638539128                 |
| G413P     | -0.07797772093833316               | G413C     | 0.18055091820010535                |
| G413D     | 0.23551165368487426                | Q414I     | -0.06106622100760965               |
| Q414T     | -0.2564405645598039                | Q414S     | -0.1562304757415291                |
| Q414V     | 0.17911926876860554                | Q414A     | 0.4060645344128986                 |
| Q414G     | 0.3932915847698727                 | Q414N     | -0.15736706708543852               |
| Q414Y     | 0.20656023207088275                | Q414D     | -0.1635659064218214                |
| T415Y     | -0.14311119049685206               | T415F     | -0.07376004007650941               |
| T415C     | 0.0515001060580213                 | T415H     | -0.2270760022375403                |
| T415L     | 0.053310642140792175               | T415R     | 0.3041812145577413                 |
| T415D     | 0.016962572527459897               | T415V     | 0.2190117812610206                 |
| T415G     | 0.2946142121961084                 | T415K     | 0.096217400659141                  |
| T415M     | 0.032095657775701836               | G416K     | -0.7975084128147943                |
| G416I     | -0.529994456129114                 | G416T     | -0.33353068051518386               |
| G416L     | -0.358102680916746                 | G416S     | 0.06730629904802218                |
| G416Q     | -0.43550404968194323               | G416P     | 0.46810322174757835                |
| G416C     | 0.09842776409459424                | G416W     | -1.2186915822490894                |
| G416D     | -0.6599579030294662                | K417L     | 0.928840673700148                  |
| K417S     | 1.3875895365485067                 | K417W     | -1.3688737066601422                |
| K417P     | 1.5514295553584994                 | K417V     | 1.0466360242250543                 |
| K417A     | 2.1707783218129943                 | K417G     | 1.954204446852041                  |

Continued on next page

Table S5 – continued from previous page

| Mutations | Binding affinity change (kcal/mol) | Mutations | Binding affinity change (kcal/mol) |
|-----------|------------------------------------|-----------|------------------------------------|
| K417Y     | -0.12559968291688503               | K417H     | -0.44952388201283683               |
| K417D     | 1.0731315252826332                 | K417I     | -0.2656272352616868                |
| I418Y     | -2.6561565079735496                | I418C     | 1.1585727794030978                 |
| I418H     | -0.9127375486679137                | I418P     | 0.4759780648670625                 |
| I418R     | 1.2461302540623551                 | I418D     | -0.07034403699196513               |
| I418A     | 1.2037730039081527                 | I418G     | 1.2140177400146683                 |
| I418K     | -0.7523134540865432                | A419N     | -0.6867767500199702                |
| A419I     | -0.3131317541888791                | A419Y     | -0.4921132222992074                |
| A419F     | -0.41245942789894696               | A419C     | 0.25941869487612546                |
| A419H     | -1.3680368351653531                | A419L     | -0.30249773541529085               |
| A419R     | -0.6991026937645316                | A419E     | -0.37470301451045707               |
| D420I     | -1.313064025854916                 | D420T     | 0.12147656421859573                |
| D420S     | 0.3036587558169427                 | D420F     | -2.234751323646837                 |
| D420C     | 0.2787723988502672                 | D420L     | -0.5200918298276871                |
| D420P     | -0.03405856051521754               | D420R     | -1.1683411622541573                |
| D420K     | -0.5096889108795489                | D420Q     | -0.11286532003676866               |
| Y421I     | 0.9075361401978075                 | Y421T     | 1.4418973766043472                 |
| Y421L     | 1.122377932506724                  | Y421P     | 1.8158260530487838                 |
| Y421R     | -0.3052966631912549                | Y421V     | 2.1020985992592984                 |
| Y421A     | 2.4271383957170536                 | Y421G     | 2.252816476347309                  |
| Y421K     | -1.4074107653672299                | Y421Q     | 0.22704644954624204                |
| Y421E     | 0.6464171014262197                 | Y421W     | 2.28066199415082                   |
| N422F     | 0.986504217914922                  | N422C     | 2.93547219576798                   |
| N422L     | 1.6530546963633328                 | N422P     | 4.602272538460145                  |
| N422R     | 1.090840116352359                  | N422V     | 2.561661114682687                  |
| N422A     | 2.710696669196033                  | N422G     | 4.123951419159619                  |
| N422Q     | -0.5446720189309348                | N422E     | 1.7251887708637448                 |
| N422M     | 2.119643378280686                  | Y423I     | 3.591273932180303                  |
| Y423T     | 1.1468235281498478                 | Y423L     | 2.3550221069041446                 |
| Y423P     | 3.9272181513469646                 | Y423R     | 2.217037239553325                  |
| Y423V     | 3.815097484269162                  | Y423A     | 4.308483397360085                  |
| Y423G     | 1.8419796411529403                 | Y423K     | 2.253401988461181                  |
| Y423Q     | 0.2273696519410196                 | Y423E     | -1.9884866795059977                |
| Y423W     | 2.4674469069219014                 | K424L     | 0.01996124768461904                |
| K424S     | -0.17652681708283832               | K424P     | 0.5521282497717477                 |
| K424V     | 0.49556261424815196                | K424A     | 0.18308526926827334                |
| K424G     | 0.11654090368838739                | K424Y     | 0.043690112576660896               |
| K424H     | -0.06295066853359867               | K424D     | 0.16134154840956516                |
| K424M     | 0.23220845483232297                | L425K     | -0.4593938263507136                |
| L425T     | -0.336796770944888                 | L425R     | -1.695172715796544                 |
| L425Q     | -0.6130221587039906                | L425P     | 0.3003625197629127                 |
| L425E     | -0.9212459571199668                | L425A     | 0.31984123912911266                |
| L425G     | 0.4148331886279714                 | L425M     | -0.0182806953617612                |
| L425Y     | -1.1639064398298768                | L425C     | 0.45843086508398                   |
| L425W     | -0.5490358028492779                | P426K     | -0.8989804321045314                |
| P426I     | 0.183686983809215                  | P426E     | 0.07632824739209379                |
| P426V     | -0.20977395549349045               | P426G     | 0.24814121132267575                |
| P426H     | -0.07298381692516284               | D427I     | -1.8243252965279055                |
| D427T     | -1.5940032102550235                | D427S     | -1.4720239253341016                |
| D427F     | -1.8211500336467594                | D427C     | -1.6398095020865977                |

Continued on next page

Table S5 – continued from previous page

| Mutations | Binding affinity change (kcal/mol) | Mutations | Binding affinity change (kcal/mol) |
|-----------|------------------------------------|-----------|------------------------------------|
| D427L     | -0.4073395889019847                | D427P     | -1.1942696874371785                |
| D427R     | -1.6259187035595168                | D427K     | -1.6439279410264702                |
| D427Q     | -1.5147068273660629                | D428I     | 0.03827092830733503                |
| D428T     | 0.08010439720144677                | D428S     | 0.10499862100847195                |
| D428F     | 0.15539941112253947                | D428C     | 0.004890891663219981               |
| D428L     | 0.1068669919772883                 | D428P     | 0.282975843615496                  |
| D428R     | 0.38311162125802223                | D428K     | 0.17908686218623843                |
| D428Q     | 0.2282020885279759                 | F429N     | 0.6845682364518699                 |
| F429T     | 0.6793605906818356                 | F429H     | 1.9576691014844023                 |
| F429P     | 0.9601171734268344                 | F429R     | 1.9389489506867783                 |
| F429D     | -1.4736923278771437                | F429A     | 0.9257442214638051                 |
| F429G     | 0.9758718822388557                 | F429M     | -0.7408155553512608                |
| F429W     | 0.3504949089555767                 | T430L     | 0.09980003611873525                |
| T430Q     | 0.4322739514681241                 | T430E     | 0.3476310561727059                 |
| T430V     | 0.04760571610718504                | T430G     | 0.18271235097910452                |
| T430N     | -0.28150130309965704               | T430M     | 0.19003064725570434                |
| G431N     | -2.539783477558341                 | G431I     | -0.7432039360375738                |
| G431T     | -0.6930348284793799                | G431Y     | -0.5677646957039626                |
| G431F     | -0.9070702387261325                | G431H     | -0.6304272152110985                |
| G431L     | 0.36303892505467805                | G431P     | 0.6932216005021752                 |
| G431W     | -1.3830603938565238                | G431E     | 0.031789012693079335               |
| C432N     | 1.3242275176259208                 | C432I     | -1.8407951746210074                |
| C432T     | -0.6110962076196281                | C432H     | -0.87076186735739                  |
| C432L     | -0.523487766344736                 | C432P     | 0.1489790974503254                 |
| C432D     | 0.24366001827237688                | C432V     | 0.4555736312161917                 |
| C432A     | 0.5200682296255925                 | V433N     | -0.008509162203217329              |
| V433T     | 0.41665398679432775                | V433S     | 0.6918585928501516                 |
| V433Y     | -0.349233030766125                 | V433C     | 1.2251492745228894                 |
| V433H     | -0.8190955355583089                | V433P     | 0.32234369604631985                |
| V433R     | -0.0031749352658920647             | V433M     | 0.8791908356835378                 |
| V433E     | 0.4429577983442787                 | I434S     | 2.470423322891207                  |
| I434Q     | 0.8047929665004323                 | I434P     | 2.042676488830017                  |
| I434E     | -0.1061542650545821                | I434A     | 2.621295554308351                  |
| I434G     | 0.26759412912103925                | I434F     | -0.07118334959774184               |
| I434N     | -1.2361391324276947                | A435N     | -0.7943542826233643                |
| A435I     | -0.6371571773365976                | A435Y     | -0.190524839727734                 |
| A435F     | -0.9295955494018241                | A435C     | 0.03609415702599271                |
| A435H     | -0.9929421175737261                | A435L     | -0.400832671030708                 |
| A435R     | -0.3835980909671004                | A435E     | -2.641449804551379                 |
| W436K     | 0.21306330792443257                | W436M     | -0.554667109386062                 |
| W436T     | -2.703827123343816                 | W436Q     | -1.6432201430349014                |
| W436P     | -0.6864500365667373                | W436E     | 0.4485146698485748                 |
| W436V     | 0.4953370691724911                 | W436A     | 0.4354315723656884                 |
| W436Y     | 0.09264755449124674                | W436F     | 0.37238186153794695                |
| N437F     | 0.15216818833135665                | N437C     | 0.44335583729415234                |
| N437L     | -0.14775491871483304               | N437P     | 0.37674204599787686                |
| N437R     | -0.5269749391528716                | N437V     | 0.04166330822484487                |
| N437A     | 0.5234949157251895                 | N437G     | 0.23663483681669523                |
| N437Q     | -0.012802201159387289              | N437E     | -0.13098334338390868               |
| N437M     | 0.22666088397032716                | S438N     | 0.13965692157531073                |

Continued on next page

Table S5 – continued from previous page

| Mutations | Binding affinity change (kcal/mol) | Mutations | Binding affinity change (kcal/mol) |
|-----------|------------------------------------|-----------|------------------------------------|
| S438I     | 0.094915485606009                  | S438H     | -0.11686797317720858               |
| S438L     | -0.04360750961310132               | S438R     | -0.044152640415388966              |
| S438D     | -0.27330661543410445               | S438V     | 0.47804051062847497                |
| S438G     | 2.307705014062354                  | S438W     | 0.020598745395904235               |
| N439F     | 0.08329191713981865                | N439C     | 0.6180654023953902                 |
| N439L     | 2.045025927907209                  | N439P     | 0.6394607480808374                 |
| N439R     | 0.008940743742822978               | N439V     | 0.3019477256629612                 |
| N439A     | 0.6527614634134988                 | N439G     | 0.4239223902044046                 |
| N439Q     | -0.03476591905652167               | N439E     | 0.5006368035751948                 |
| N439M     | 0.42733302346100277                | N440F     | -0.4676765138079448                |
| N440C     | 0.21478658126952369                | N440L     | -0.34829943424644527               |
| N440P     | 0.17838068989879835                | N440R     | -0.2433085256398801                |
| N440V     | 0.017664201764625673               | N440A     | 0.32591826990972994                |
| N440G     | 0.030978380409861013               | N440Q     | 0.5004257177521648                 |
| N440E     | 1.0619144245654266                 | N440M     | -0.46492250716125527               |
| L441N     | 0.007241924324132567               | L441T     | 0.29118253861279375                |
| L441S     | 0.10521016757048078                | L441Y     | 0.003459090292642118               |
| L441C     | 0.11514495951813646                | L441D     | -0.39459254823466744               |
| L441A     | 0.29620874705533307                | L441G     | 0.08653785572830375                |
| L441M     | -0.13406472097755004               | L441Q     | -0.03856600247663292               |
| D442I     | -0.9047989336925589                | D442T     | 0.007843672459906376               |
| D442S     | 0.02661634927364535                | D442F     | -0.47104215038360586               |
| D442C     | 0.34597943637926043                | D442L     | -0.7355682140438555                |
| D442P     | 0.022975927438759224               | D442R     | -0.6774964666340739                |
| D442K     | -0.45378860372149765               | D442Q     | -0.17072416179992772               |
| S443N     | 0.3872242849118611                 | S443I     | -2.0044402732355384                |
| S443H     | -2.706417212837728                 | S443L     | -2.8356062002939444                |
| S443R     | -2.4189796571149964                | S443D     | 0.012863926491140936               |
| S443V     | 0.20011022122593936                | S443G     | -0.7753375897057939                |
| S443W     | -2.588906040953984                 | K444L     | 2.2202268823949907                 |
| K444S     | 0.9749691264184591                 | K444W     | 1.4619707778541686                 |
| K444P     | 3.2707266360158798                 | K444V     | 2.221654954684536                  |
| K444A     | 1.7345707427500596                 | K444G     | 1.2434145012364446                 |
| K444Y     | 1.593635246095515                  | K444H     | 2.674146975262097                  |
| K444D     | -0.029579224396264425              | K444I     | 1.8329163541237818                 |
| V445N     | -0.11560316483248734               | V445T     | 0.25011665174134434                |
| V445S     | 0.33096427010594176                | V445Y     | -1.6210865360094608                |
| V445C     | 0.16345481120066557                | V445H     | -0.48873877877090066               |
| V445P     | 0.40157491238392284                | V445R     | 0.1591827442423664                 |
| V445M     | -0.47902498457030146               | V445E     | -0.18877227419038003               |
| G446N     | -0.23249014571524512               | G446I     | 0.003412518914075785               |
| G446T     | -0.23428359510970784               | G446Y     | -2.120883420773848                 |
| G446F     | -1.1032094844887503                | G446H     | 0.4638352334320536                 |
| G446L     | -0.2771762060696231                | G446P     | -0.0179254363995969                |
| G446W     | -1.384395541173311                 | G446E     | -0.9036665881284373                |
| G447N     | -0.7085087766726812                | G447I     | -0.07739203370044101               |
| G447T     | -0.14671936561360652               | G447Y     | -0.8093947932443353                |
| G447F     | -0.3963222411990709                | G447H     | -1.1866720119383705                |
| G447L     | -0.3584835170739525                | G447P     | 0.2661561613375667                 |
| G447W     | -1.130125150828017                 | G447E     | -0.5761576595757207                |

Continued on next page



**Table S5 – continued from previous page**

| Mutations | Binding affinity change (kcal/mol) | Mutations | Binding affinity change (kcal/mol) |
|-----------|------------------------------------|-----------|------------------------------------|
| N448F     | 0.08841906943497085                | N448C     | -0.1125083340889979                |
| N448L     | -1.2742450773574014                | N448P     | -0.11551145818930746               |
| N448R     | -1.5541964464635014                | N448V     | 0.6540083933272057                 |
| N448A     | 0.030830625032351955               | N448G     | -0.41923486051659464               |
| N448Q     | 1.2432879985293188                 | N448E     | -0.9143443907867995                |
| N448M     | -0.048478588427680505              | Y449I     | 0.959191122571645                  |
| Y449T     | 0.9129311640401745                 | Y449L     | 0.8958248520447565                 |
| Y449P     | 1.5045608574362705                 | Y449R     | 0.5487813711258746                 |
| Y449V     | 1.0260459536610103                 | Y449A     | 1.5006740431821264                 |
| Y449G     | 1.3479271339127281                 | Y449K     | -1.1675279557719378                |
| Y449Q     | 0.6652141760332494                 | Y449E     | 0.8581600554294807                 |
| Y449W     | -1.4208648522749217                | N450F     | 0.6893910641130462                 |
| N450C     | 0.8118479476047173                 | N450L     | 0.5516813921959278                 |
| N450P     | 0.11940529985230934                | N450R     | -0.5088357725609419                |
| N450V     | 0.760887586719978                  | N450A     | 0.7587318188689643                 |
| N450G     | 0.49907384988373493                | N450Q     | 2.0583072609971307                 |
| N450E     | 0.3950511493377623                 | N450M     | 0.7112480458682404                 |
| Y451I     | 0.5583307564804837                 | Y451T     | -2.9538370386418316                |
| Y451L     | -0.15476528936084266               | Y451P     | 0.6883562705725893                 |
| Y451R     | -0.19134388518378043               | Y451V     | 0.45001670098566643                |
| Y451A     | 0.7944720794858686                 | Y451G     | 1.0570815196891037                 |
| Y451K     | 0.06810211913297452                | Y451Q     | 0.1656355592297779                 |
| Y451E     | -0.22650600572717905               | Y451W     | 0.47671492829669626                |
| L452K     | -0.6906175699346959                | L452T     | 2.0355147250561574                 |
| L452S     | 1.4559591562304863                 | L452W     | 0.8776071743577486                 |
| L452E     | -0.9731778249316904                | L452A     | 1.9619089870665234                 |
| L452G     | 1.2505522458245844                 | L452I     | -1.4863913832805324                |
| L452F     | -0.5202240146117277                | L452H     | 3.1179328384421305                 |
| Y453I     | 0.6264632171508121                 | Y453T     | 0.9018352178591942                 |
| Y453L     | 1.4696182868477812                 | Y453P     | 1.4800418200951495                 |
| Y453R     | -0.5449547526411362                | Y453V     | 1.102049546919883                  |
| Y453A     | 1.4273017451504038                 | Y453G     | 1.2853811270855189                 |
| Y453K     | -0.36997780475547903               | Y453Q     | 0.3108939788277939                 |
| Y453E     | 0.4399288736778514                 | Y453W     | -0.34088805000354255               |
| R454L     | -0.37089881995687896               | R454Q     | -0.9084917076852248                |
| R454P     | -1.2915636994500472                | R454E     | 2.6848411315566336                 |
| R454V     | -1.907806318319985                 | R454A     | 0.397022744265861                  |
| R454C     | 0.2954572874123712                 | R454W     | -0.27037840214020487               |
| R454N     | 0.8029969737482672                 | R454M     | -2.107236720803126                 |
| L455K     | 1.353695543626061                  | L455T     | -0.27086479771847094               |
| L455R     | -2.266270674494373                 | L455Q     | -0.3882201616333587                |
| L455P     | -0.4180495765162937                | L455E     | -0.5309871870445565                |
| L455A     | 0.6326752551822747                 | L455G     | 0.4855781017912955                 |
| L455I     | -0.229817050671162                 | L455Y     | -0.6843613119566184                |
| L455C     | 0.3496483510271277                 | F456N     | -2.604355212490244                 |
| F456T     | 0.791558060530448                  | F456H     | -1.6646862309364365                |
| F456P     | 1.1042114340601956                 | F456R     | -0.045057188862784904              |
| F456D     | 0.6782819741547559                 | F456A     | 1.2794170017924484                 |
| F456G     | 0.9482973938002222                 | F456M     | 0.7156223678279992                 |
| F456W     | -3.526118781159672                 | R457L     | -0.16996681191875893               |

Continued on next page

Table S5 – continued from previous page

| Mutations | Binding affinity change (kcal/mol) | Mutations | Binding affinity change (kcal/mol) |
|-----------|------------------------------------|-----------|------------------------------------|
| R457Q     | -0.49149040279783823               | R457P     | 0.39988639189879915                |
| R457E     | -0.06408199808737694               | R457V     | -0.15934934471425294               |
| R457A     | 0.4492786466715265                 | R457C     | 0.40539094403348563                |
| R457N     | -0.5628962605407221                | R457I     | -0.16816031487477912               |
| K458L     | 0.03536414512261203                | K458S     | 0.33823915297930646                |
| K458W     | -0.6762182832204818                | K458P     | 0.36996268797691056                |
| K458V     | 0.9763417438917446                 | K458A     | 0.844075239654946                  |
| K458G     | 1.1487447954575594                 | K458Y     | -0.35089144628978286               |
| K458H     | 0.08667732752144007                | K458D     | 0.20701908744294797                |
| K458I     | 0.5583910054278836                 | S459N     | 0.08672373822822055                |
| S459I     | 0.22217414453447146                | S459H     | 0.14831050017773598                |
| S459L     | 0.15658131672809114                | S459R     | -0.0632793265814269                |
| S459D     | -0.0988043293390459                | S459V     | 0.20684588502692383                |
| S459G     | 0.10733450017921557                | S459W     | -0.16271310749178663               |
| N460F     | 1.6948162940703029                 | N460C     | 2.3554478453513                    |
| N460L     | 1.73730747327538                   | N460P     | 1.0488084760353829                 |
| N460R     | -1.6665514983797707                | N460V     | 1.1638148583273096                 |
| N460A     | 2.49478785642845                   | N460G     | 1.2454869269223656                 |
| N460Q     | 0.666229274363213                  | N460E     | 0.5064154080244465                 |
| N460M     | 1.311827670786648                  | L461N     | -0.3950286305319911                |
| L461T     | -0.11302762028607209               | L461S     | 0.10784177279558065                |
| L461Y     | -0.10104324389037107               | L461C     | 0.6288282286753593                 |
| L461D     | 0.15834972049707247                | L461A     | 0.5729585557234548                 |
| L461G     | 0.6190779516895212                 | L461M     | 0.2481733767341369                 |
| L461Q     | -0.16208396210907278               | K462L     | -0.017250783158793154              |
| K462S     | 0.15466810104331188                | K462P     | 0.27578750105034044                |
| K462V     | 0.003933262265301761               | K462A     | 0.16682632894730046                |
| K462G     | 0.10230534161432617                | K462Y     | -0.10752760037689155               |
| K462H     | 0.036807284523651784               | K462D     | 0.039418702659017014               |
| K462M     | 0.033410287289026674               | P463N     | -0.426038627110534                 |
| P463I     | -0.09518274659656548               | P463Y     | -0.36395068473370384               |
| P463F     | -0.4534796998006464                | P463C     | -0.1609386073665659                |
| P463D     | -0.1005532060552335                | P463V     | -0.07349143960365626               |
| P463G     | -0.06380116031102792               | P463Q     | -0.06574100201276487               |
| F464N     | -0.5849053713952281                | F464T     | -1.5841561815446468                |
| F464H     | 1.2532511562996367                 | F464P     | 0.45401458273449447                |
| F464R     | -0.9039556248439873                | F464D     | -1.6032041991851784                |
| F464A     | -0.9070814771315117                | F464G     | 0.16427475571117384                |
| F464M     | -0.018301738491006175              | F464W     | -0.15742102160587612               |
| E465M     | -0.15794865784890785               | E465T     | -0.08698816727582086               |
| E465R     | -0.5457498047019868                | E465L     | -0.5103978696338073                |
| E465S     | 0.04073405715994855                | E465W     | -0.04938050521475533               |
| E465P     | -0.171782005533399                 | E465N     | -0.010101317078734014              |
| E465Y     | -0.402557949790087                 | E465H     | -0.18926910666635735               |
| R466L     | 0.1274100737232281                 | R466Q     | -0.09979380392492558               |
| R466P     | 0.7247337010041415                 | R466E     | 0.42576627266087064                |
| R466V     | 0.40132138730862543                | R466A     | 0.6864785603307391                 |
| R466C     | 0.684580414176885                  | R466W     | 0.4572231359327197                 |
| R466N     | 0.12380737105087725                | R466M     | 0.6062175544996725                 |
| D467I     | -0.6585588292995302                | D467T     | 0.02387587042386186                |

Continued on next page

**Table S5 – continued from previous page**

| Mutations | Binding affinity change (kcal/mol) | Mutations | Binding affinity change (kcal/mol) |
|-----------|------------------------------------|-----------|------------------------------------|
| D467S     | 0.11350470378125917                | D467F     | -0.5307318014029111                |
| D467C     | 0.3791724299296542                 | D467L     | -0.5811754946800062                |
| D467P     | -0.13019309882383504               | D467R     | -0.45441153161604547               |
| D467K     | -0.4212684735179078                | D467Q     | 0.05249584395634773                |
| I468Y     | -0.11406587675002958               | I468C     | 0.03042343674103623                |
| I468H     | 0.22660553157597932                | I468P     | 0.23008060427635982                |
| I468R     | -0.3561969765664775                | I468D     | -0.07128381222501853               |
| I468A     | 0.19256889920530462                | I468G     | 0.05868422388612345                |
| I468K     | -0.02248934087731922               | S469K     | 0.11458287709045131                |
| S469I     | -0.3269394250973685                | S469R     | -0.2916134334655807                |
| S469Q     | 0.19938816954762134                | S469E     | -0.9481755384905199                |
| S469V     | 0.19215141512208767                | S469G     | 0.11957749812911636                |
| S469Y     | 0.061154277571174843               | S469F     | 0.1543792060111817                 |
| S469C     | -0.05980293765582299               | S469W     | 0.12465338182947328                |
| T470Y     | -0.207177936217608                 | T470F     | -0.157718345980476                 |
| T470C     | 0.07917529676770842                | T470H     | -0.28151824300670225               |
| T470L     | 0.00034072077103690574             | T470R     | -1.1074387599209308                |
| T470D     | 0.012675164366301528               | T470V     | 0.15411046229264674                |
| T470G     | -0.037835864983559536              | T470K     | -1.4249422902793136                |
| T470M     | -0.09636784736850898               | E471I     | -0.11592606127282297               |
| E471T     | 0.2848893809942154                 | E471R     | -0.11468579784585957               |
| E471L     | -0.047413693764019584              | E471S     | 0.3503155377443127                 |
| E471P     | 0.03798097858447401                | E471N     | 0.22356550917510756                |
| E471Y     | -0.19822991158624156               | E471H     | -4.2508028695613405                |
| I472Y     | 0.08124702915538748                | I472C     | 0.4136899415958002                 |
| I472H     | -2.6263278140891577                | I472P     | 0.49495589661742007                |
| I472R     | 0.4477279899991844                 | I472D     | 0.42897892738201016                |
| I472A     | 0.5435901437375119                 | I472G     | 0.3538151035290403                 |
| I472K     | 0.6271053108208653                 | Y473I     | 0.5016435292750795                 |
| Y473T     | 0.3894415686336056                 | Y473L     | 0.4744691326533449                 |
| Y473P     | 0.9490268228345997                 | Y473R     | 0.22589906095567666                |
| Y473V     | -0.8607358972544918                | Y473A     | 0.7451770710335103                 |
| Y473G     | 0.5277275133933005                 | Y473K     | 0.32063257335616613                |
| Y473Q     | 0.08381165797681639                | Y473E     | -0.4584140677462333                |
| Y473W     | 0.23683915358194865                | Q474M     | 0.25388748516722176                |
| Q474T     | -0.17389805753532767               | Q474S     | 1.2593146869906577                 |
| Q474W     | -0.49555880464928637               | Q474V     | 0.04321635393839789                |
| Q474A     | 0.5357661523776348                 | Q474G     | 0.30435326677011376                |
| Q474N     | -0.7427677758800151                | Q474Y     | -0.17083751021056168               |
| Q474D     | 0.1664315550599919                 | A475N     | -0.4730374726198997                |
| A475I     | -0.6263656665361911                | A475Y     | -1.8584286011615756                |
| A475F     | -0.8308277352890661                | A475C     | -0.259174273960272                 |
| A475H     | -1.0823688861877048                | A475L     | -0.5713568715400064                |
| A475R     | -1.084118909416938                 | A475E     | -0.9357473104829968                |
| G476N     | -0.1431833133977813                | G476I     | -1.5569860039146195                |
| G476T     | 0.7080442358912629                 | G476Y     | -0.3717369836715786                |
| G476F     | -0.9035264670604753                | G476H     | -0.09450182479868294               |
| G476L     | -0.7768152290501069                | G476P     | -1.1956782483258606                |
| G476W     | -0.7164327704491906                | G476E     | -0.17794105246788927               |
| S477Y     | -0.03686733863917966               | S477F     | 0.08954653853480722                |

Continued on next page

**Table S5 – continued from previous page**

| Mutations | Binding affinity change (kcal/mol) | Mutations | Binding affinity change (kcal/mol) |
|-----------|------------------------------------|-----------|------------------------------------|
| S477H     | 0.16276375511536084                | S477L     | 0.4429810731256496                 |
| S477P     | 0.36409996464007527                | S477D     | -0.029090122965994697              |
| S477V     | 0.43527331233102473                | S477A     | 0.3089622225959847                 |
| S477W     | -0.17949355283271515               | S477K     | 0.23973644503656694                |
| S477M     | 0.2290437881229231                 | T478L     | 0.07916796992157353                |
| T478Q     | 0.10986469712554195                | T478E     | 0.17138313477790726                |
| T478V     | 0.09442355985935161                | T478G     | 0.24985165996664366                |
| T478N     | 0.08857098423953107                | T478M     | -1.1989712921500992                |
| P479N     | -0.012838553718728926              | P479I     | 0.22668995258026364                |
| P479Y     | 0.08209595496899832                | P479F     | 0.11929485482999273                |
| P479C     | -0.07515218396158038               | P479D     | -1.1501381754547182                |
| P479V     | 0.15166913013107322                | P479G     | 0.10197211007258862                |
| P479Q     | 0.11616995412728333                | C480N     | -0.9508115437970872                |
| C480I     | -0.002970326970688476              | C480T     | 0.27108669769540283                |
| C480H     | -0.1874470256583936                | C480L     | 0.07355191805576795                |
| C480P     | 0.34195011548325016                | C480D     | -0.5573724903477237                |
| C480V     | 0.08973951561531875                | C480A     | 0.41156144318280824                |
| N481F     | -0.47433905389314424               | N481C     | -0.3911224887564305                |
| N481L     | -0.026361925781032795              | N481P     | 0.16648383987293972                |
| N481R     | -0.23568912001805625               | N481V     | -0.23214539439387205               |
| N481A     | -0.18035302389736985               | N481G     | -0.15153602989973608               |
| N481Q     | -0.09700053895158187               | N481E     | -0.23879256650951816               |
| N481M     | -0.17169077025537183               | G482N     | 0.16907850891320947                |
| G482I     | 0.28712640009717993                | G482T     | 0.20520093855767976                |
| G482Y     | 0.12851563143082184                | G482F     | 0.16243516941170683                |
| G482H     | 0.20913969807415578                | G482L     | 0.21953331696129902                |
| G482P     | 0.3992868766124523                 | G482W     | 0.05524569695305076                |
| G482E     | 0.21509834013734458                | V483N     | 0.030469004042414927               |
| V483T     | -0.11316559161545672               | V483S     | -0.012095054218635947              |
| V483Y     | -0.13474929458853727               | V483C     | -0.05875437825627035               |
| V483H     | 0.10530537244884178                | V483P     | 0.15778867815759917                |
| V483R     | 0.04281186042208447                | V483M     | -0.0531552528210545                |
| V483E     | 0.10199374141612913                | E484I     | 0.1393919505483133                 |
| E484T     | -1.4557616040076824                | E484R     | -1.1404130822258998                |
| E484L     | 0.6078093743504895                 | E484S     | 1.5656724407551494                 |
| E484P     | 1.7264912621270607                 | E484N     | 1.3451283382162846                 |
| E484Y     | 0.26543552586327185                | E484H     | 0.5593734751588715                 |
| G485N     | 0.12375068675743857                | G485I     | 0.2794593089455816                 |
| G485T     | 0.16411392669778516                | G485Y     | -0.23865540578206373               |
| G485F     | -0.0918994419261973                | G485H     | 0.09254783323636116                |
| G485L     | 0.1979669821013185                 | G485P     | 0.19521946688575798                |
| G485W     | -0.18565201119060273               | G485E     | 0.20324346566530535                |
| F486N     | 0.8141581273836647                 | F486T     | 0.7159194656679458                 |
| F486H     | 1.1499283127358606                 | F486P     | 1.1258621495317027                 |
| F486R     | 0.8861029616104374                 | F486D     | -0.6667983846012092                |
| F486A     | 0.9200986782693775                 | F486G     | 0.7459659431517613                 |
| F486M     | 0.6452947941396829                 | F486W     | 0.2852502621233624                 |
| N487F     | 0.3162840332795067                 | N487C     | 0.8950500759947154                 |
| N487L     | 0.5413067981066152                 | N487P     | 1.0193884652728182                 |
| N487R     | 0.7119526868588544                 | N487V     | 1.2419473671134111                 |

Continued on next page

Table S5 – continued from previous page

| Mutations | Binding affinity change (kcal/mol) | Mutations | Binding affinity change (kcal/mol) |
|-----------|------------------------------------|-----------|------------------------------------|
| N487A     | 1.0085304745673187                 | N487G     | 0.7196138861581399                 |
| N487Q     | -0.9062386322451961                | N487E     | 0.5850747304976713                 |
| N487M     | 1.2189019505002168                 | C488N     | 0.05257970128485534                |
| C488I     | 0.09232493025939167                | C488T     | 0.19825572253337412                |
| C488H     | -0.0745400764733611                | C488L     | 0.05773198983650248                |
| C488P     | 0.10911850804222187                | C488D     | 0.12337178465316503                |
| C488V     | 0.22026230362077753                | C488A     | 0.509355159457225                  |
| Y489I     | 2.0687086225280242                 | Y489T     | 2.8595065823112185                 |
| Y489L     | 3.328997783244252                  | Y489P     | 3.4878761266218894                 |
| Y489R     | 2.6018139784678866                 | Y489V     | 2.3306804459530936                 |
| Y489A     | 2.8303576884259467                 | Y489G     | 3.8767062820568925                 |
| Y489K     | 3.554488194923087                  | Y489Q     | 3.5245898135934146                 |
| Y489E     | 3.0224267539524563                 | Y489W     | 2.095495328306142                  |
| F490N     | 0.5216076814700503                 | F490T     | 0.17850245699387363                |
| F490H     | 0.9579819582935649                 | F490P     | 0.9229947568304404                 |
| F490R     | 0.10427857104047651                | F490D     | 0.5559528055917398                 |
| F490A     | 0.7771263248755629                 | F490G     | 0.7291569476548918                 |
| F490M     | 0.5487079230386612                 | F490W     | 0.3343071674847178                 |
| P491N     | 0.8923917733460227                 | P491I     | -0.28878008263704674               |
| P491Y     | 0.09288871209861951                | P491F     | -0.2565319995561                   |
| P491C     | 0.4394460616183614                 | P491D     | 0.0775626282477545                 |
| P491V     | 0.020660836390701435               | P491G     | 0.4109238908796266                 |
| P491Q     | -0.41806375347885866               | L492K     | 0.31501028535961273                |
| L492T     | 0.16089145750259168                | L492R     | -0.034736153232858266              |
| L492Q     | 0.008451826122055762               | L492P     | 1.0291279511068692                 |
| L492E     | 0.2668673549356261                 | L492A     | 1.0052355537765734                 |
| L492G     | 0.48342427555160983                | L492M     | -0.5529239015440983                |
| L492Y     | -0.22084076732315397               | L492C     | 1.1424949255154897                 |
| L492W     | 1.1375960874240865                 | Q493I     | 1.8698680204370075                 |
| Q493T     | -0.12966178780807872               | Q493S     | 0.42892975508810005                |
| Q493V     | -0.5633552253131799                | Q493A     | 2.226113922876471                  |
| Q493G     | 1.2700962920884344                 | Q493N     | -1.1856350499090245                |
| Q493Y     | 0.9209849410469555                 | Q493D     | -0.32641223210199644               |
| S494K     | -0.31660097360225464               | S494I     | -0.1997536565003554                |
| S494R     | -0.26605985125467924               | S494Q     | -1.8016760375265761                |
| S494E     | -0.5091905688774663                | S494V     | -0.4676196007396671                |
| S494G     | 0.2870840314591076                 | S494Y     | -0.9259060326714051                |
| S494F     | -0.5617263419275469                | S494C     | 0.1338891862897647                 |
| S494W     | -0.9643426825787017                | Y495I     | 0.788571269172388                  |
| Y495T     | 0.8585420422185617                 | Y495L     | -0.3710257822779591                |
| Y495P     | -0.42605972149898375               | Y495R     | 3.7037900148678915                 |
| Y495V     | -2.6481252497719963                | Y495A     | 1.3406535527648087                 |
| Y495G     | -1.7574293142613537                | Y495K     | 1.8365733010781564                 |
| Y495Q     | 3.4943050977205936                 | Y495E     | 0.5536919633452965                 |
| Y495W     | 1.0134498810558092                 | G496N     | -0.07292074497741804               |
| G496I     | -0.5371494934225638                | G496T     | -0.24440884831514453               |
| G496Y     | -1.2595556051925316                | G496F     | -1.254879795580654                 |
| G496H     | 2.383008622803003                  | G496L     | -0.7302099534919916                |
| G496P     | -0.5433945647999086                | G496W     | 2.37173789905886                   |
| G496E     | -0.9567835611496658                | F497N     | -0.5810539809186916                |

Continued on next page

Table S5 – continued from previous page

| Mutations | Binding affinity change (kcal/mol) | Mutations | Binding affinity change (kcal/mol) |
|-----------|------------------------------------|-----------|------------------------------------|
| F497T     | 0.5339433566400469                 | F497H     | -0.4763974478211835                |
| F497P     | 0.8816524401333646                 | F497R     | -0.32571064650455145               |
| F497D     | 0.22656166096624658                | F497A     | 1.122501329637979                  |
| F497G     | 1.0289140604755698                 | F497M     | 0.7179387658333563                 |
| F497W     | -0.30313290656514036               | Q498I     | 0.34547274072986084                |
| Q498T     | 0.2747060289054572                 | Q498S     | 0.6308876452519263                 |
| Q498V     | 0.6364204492566058                 | Q498A     | 0.8558870164492784                 |
| Q498G     | 0.9894633836701724                 | Q498N     | 0.4430631320358224                 |
| Q498Y     | -0.41271257393316485               | Q498D     | 0.05858330158520567                |
| P499N     | -0.24760089750812772               | P499I     | 0.40345797682667506                |
| P499Y     | -1.7495719305312574                | P499F     | -0.3963975873360791                |
| P499C     | 0.18483906954948517                | P499D     | -0.46586046985918034               |
| P499V     | -0.015695644269561427              | P499G     | 0.007194744825854096               |
| P499Q     | -0.1609778349445597                | T500Y     | -2.0859449459796644                |
| T500F     | 0.06502253090993926                | T500C     | 0.430635516016884                  |
| T500H     | -1.7392904541056466                | T500L     | 0.021255830061814193               |
| T500R     | 0.043354998387680685               | T500D     | -0.7658521184154594                |
| T500V     | 0.9613207853553403                 | T500G     | 2.399206799257318                  |
| T500K     | -0.31728831536669616               | T500M     | 0.19822969783981337                |
| N501F     | -0.04385977247764152               | N501C     | 1.0439369512335408                 |
| N501L     | 0.18341469720698914                | N501P     | 1.1609463991960838                 |
| N501R     | -0.7441464154535433                | N501V     | 3.965497877149798                  |
| N501A     | 1.1852260420841207                 | N501G     | 0.38130741094221754                |
| N501Q     | -0.40521444437824233               | N501E     | -0.47102212719029657               |
| N501M     | 1.382764667958684                  | G502N     | -0.1049075533287536                |
| G502I     | -0.6926329920064511                | G502T     | -0.285344394100541                 |
| G502Y     | -0.921811520303691                 | G502F     | -0.576493263354875                 |
| G502H     | -0.20559029965274994               | G502L     | -0.5671088229101959                |
| G502P     | -0.10139439929755241               | G502W     | -0.8767128631282775                |
| G502E     | -0.37910317570040536               | V503N     | 1.0967388249672534                 |
| V503T     | -0.04569451812155616               | V503S     | 0.5844626128165492                 |
| V503Y     | -0.02384079012367129               | V503C     | 0.4509271759068342                 |
| V503H     | 0.28082778448573625                | V503P     | 0.11756147082026469                |
| V503R     | -0.21616903988720484               | V503M     | -0.009731243983262394              |
| V503E     | -0.027539387202509664              | G504N     | -0.20331123859110534               |
| G504I     | -0.06370358570189512               | G504T     | -0.15617241391762424               |
| G504Y     | -1.4263632739486383                | G504F     | -0.5003645249655616                |
| G504H     | -1.6964188204959219                | G504L     | -0.5045378548940749                |
| G504P     | -0.13589613963574762               | G504W     | -1.7176558290068844                |
| G504E     | -0.02947514167831017               | Y505I     | -3.467147511981561                 |
| Y505T     | 0.7785040665354467                 | Y505L     | 0.2958366346393961                 |
| Y505P     | 1.5915037169810309                 | Y505R     | 2.52662820267434                   |
| Y505V     | -0.9092522194726437                | Y505A     | 1.907615764828416                  |
| Y505G     | 4.768169533634241                  | Y505K     | 2.911848681970258                  |
| Y505Q     | 1.8789389514342922                 | Y505E     | 1.3532547380461049                 |
| Y505W     | -1.8072251009011002                | Q506I     | -0.33059365388009765               |
| Q506T     | 0.2598174570020193                 | Q506S     | 1.5240796861263903                 |
| Q506V     | 0.5797347329269933                 | Q506A     | 1.1697961799344203                 |
| Q506G     | 0.37302499129504063                | Q506N     | 0.5810940509309088                 |
| Q506Y     | -0.4469687925419093                | Q506D     | -0.289210659246448                 |

Continued on next page

**Table S5 – continued from previous page**

| Mutations | Binding affinity change (kcal/mol) | Mutations | Binding affinity change (kcal/mol) |
|-----------|------------------------------------|-----------|------------------------------------|
| P507K     | -0.4114804642960072                | P507I     | 0.03571326545060595                |
| P507E     | 0.10148492827838544                | P507V     | -0.1458046036347433                |
| P507G     | 0.054115878130992875               | P507H     | 0.014675406072253549               |
| Y508I     | 0.5784949044830723                 | Y508T     | 1.2342474504324068                 |
| Y508L     | 0.419395837623682                  | Y508P     | 1.1757926039992443                 |
| Y508R     | 0.12365877341819036                | Y508V     | 0.6766562136533377                 |
| Y508A     | 0.42740616097241285                | Y508G     | 0.3568508435882431                 |
| Y508K     | 0.6614148998900773                 | Y508Q     | 0.20702703829055932                |
| Y508E     | -0.19147818447719123               | Y508W     | 0.27038476046435067                |
| R509L     | 0.4180190377749927                 | R509Q     | 0.4688403523426993                 |
| R509P     | 0.7023611054384744                 | R509E     | 0.3481358378982541                 |
| R509V     | 0.12633475900477426                | R509A     | 0.3621914382018112                 |
| R509C     | 0.4037149437047788                 | R509W     | 0.3608264633584104                 |
| R509N     | 1.200598770930513                  | R509M     | 0.4273970164495964                 |
| V510K     | -0.4818586377736228                | V510T     | -0.29171626715335297               |
| V510R     | -0.5752634268775207                | V510S     | -0.506409333203224                 |
| V510Q     | -0.7753363647935946                | V510P     | -0.010412517278919842              |
| V510M     | 0.024950603713397346               | V510F     | -0.21633560435112614               |
| V510D     | -0.6810368536201123                | V511K     | -2.572126205954558                 |
| V511T     | 1.0656264295619846                 | V511R     | -3.0569506362909937                |
| V511S     | -1.9367099380925321                | V511Q     | 3.513213294731527                  |
| V511P     | -1.8840216048560907                | V511M     | -2.2415404264587586                |
| V511F     | -1.630475399487398                 | V511D     | -1.4705066057986802                |
| V512K     | -1.2529820855928369                | V512T     | 0.7758144366419877                 |
| V512R     | 0.7507992656671869                 | V512S     | 0.14653727145204912                |
| V512Q     | -0.02862537588314193               | V512P     | 0.4016552595249828                 |
| V512M     | 0.3266475247266181                 | V512F     | 1.2966284789154074                 |
| V512D     | 1.2732678737619492                 | L513N     | 0.3263585783246893                 |
| L513T     | 0.2044945343405317                 | L513S     | 0.240075365438216                  |
| L513Y     | -0.45025133317421384               | L513C     | 0.4046997298149261                 |
| L513D     | -0.11800024479221179               | L513A     | 0.4332801693992187                 |
| L513G     | 0.36445347807120243                | L513M     | -0.21475431740595496               |
| L513Q     | -0.04706119931115208               | S514N     | 0.11253819497321796                |
| S514I     | 0.0697152801450835                 | S514H     | 0.6834461710970589                 |
| S514L     | 0.31838385119005463                | S514R     | 0.06170166622411431                |
| S514D     | -0.019612994313028397              | S514V     | 0.13916366502279032                |
| S514G     | -0.005999564234634944              | S514W     | 0.4614271756678666                 |
| F515N     | 1.7391426613751921                 | F515T     | 1.4059268469844515                 |
| F515H     | -0.5867102638541396                | F515P     | 0.0825244834417588                 |
| F515R     | -0.02798682853691018               | F515D     | 0.6019666645152028                 |
| F515A     | 1.3066996459181985                 | F515G     | 1.318477907776052                  |
| F515M     | 1.687318561382129                  | F515W     | 1.8989919207835846                 |
| E516I     | 0.33434982440468175                | E516T     | -0.07114549763358052               |
| E516R     | -0.5739477438052276                | E516L     | -0.2451664912330393                |
| E516S     | 0.1883679930848659                 | E516P     | -0.03251400587771075               |
| E516N     | -0.5168454823042706                | E516Y     | -0.7410776900577012                |
| E516H     | -0.27768247613840796               | L517N     | 0.03725614305790226                |
| L517T     | -0.0658318099980003                | L517S     | 0.037379220697849366               |
| L517Y     | -0.04992565146987564               | L517C     | 0.06579994933352533                |
| L517D     | -1.8405131167293671                | L517A     | 0.2618793059821508                 |

Continued on next page

**Table S5 – continued from previous page**

| Mutations | Binding affinity change (kcal/mol) | Mutations | Binding affinity change (kcal/mol) |
|-----------|------------------------------------|-----------|------------------------------------|
| L517G     | 0.00726076304289465                | L517M     | 0.15918026005586072                |
| L517Q     | -1.773652453091889                 | L518K     | 0.036736264682740646               |
| L518T     | 0.055156531685865415               | L518S     | -0.01901648991827292               |
| L518E     | 0.19755642142809998                | L518A     | 0.3681229182613314                 |
| L518G     | 0.27466041869769303                | L518M     | 0.18012407903819103                |
| L518F     | 0.33161318793651207                | L518H     | 0.32071311333695385                |
| H519I     | 0.19550960252101332                | H519T     | 0.10829071581286479                |
| H519S     | 0.12536228301640415                | H519F     | 0.22542804239144226                |
| H519C     | -0.04095977029425426               | H519V     | 0.2161806745604705                 |
| H519A     | 0.2741018034253032                 | H519G     | 0.24100116045220682                |
| H519K     | 0.17465590929378358                | H519E     | 0.3302499626009706                 |
| A520K     | 0.18815257451734463                | A520I     | 0.14750254370499757                |
| A520R     | -0.20701126643177403               | A520L     | 0.2936273444728296                 |
| A520Q     | -0.020121526259257                 | A520D     | 0.23674805512236627                |
| P521K     | 0.142642005822125                  | P521I     | 0.19116706361527908                |
| P521E     | 0.17155849372934995                | P521V     | 0.18530866759402792                |
| P521G     | 0.22449309283513624                | P521H     | 0.10797148365079064                |
| A522K     | -0.07811806221872608               | A522I     | 0.045237343415504845               |
| A522R     | 0.010082253892655222               | A522L     | -0.046668011903408774              |
| A522Q     | -0.16911887747369186               | A522D     | 0.04544407638273804                |
| T523Y     | 0.2574102045301572                 | T523F     | 0.5814201950203837                 |
| T523C     | 0.5629995114666447                 | T523H     | 0.6756646673111713                 |
| T523L     | 0.4774490184247681                 | T523R     | 0.4953454249607522                 |
| T523D     | 0.26197201405569437                | T523V     | 0.4273969305616685                 |
| T523G     | 0.2986339441279401                 | T523K     | 0.41978240259171695                |
| T523M     | 0.5006656529482786                 | V524N     | 1.8923163489217558                 |
| V524T     | 0.996020426627967                  | V524S     | 2.131985576890781                  |
| V524Y     | -0.36583593788500657               | V524C     | 1.3735292020874623                 |
| V524H     | -0.18948706103497398               | V524P     | 0.6612827682236818                 |
| V524R     | -0.563434616625101                 | V524M     | 1.3776899767974111                 |
| V524E     | 0.6332136709875742                 | C525N     | -0.7812551410544439                |
| C525I     | 0.37770578220002093                | C525T     | 0.6354308523644421                 |
| C525H     | 0.4057453924765685                 | C525L     | 0.5597910254431415                 |
| C525P     | 0.5886193287791198                 | C525D     | -0.7851323423560228                |
| C525V     | 0.47187589318198064                | C525A     | 0.607870889268009                  |
| G526K     | -0.16636624162594643               | G526I     | -1.302820004435949                 |
| G526T     | -1.0633939960273977                | G526L     | 0.13840453988560703                |
| G526S     | -0.06652132249728182               | G526Q     | -0.13987945121516715               |
| G526P     | 0.21967057587224295                | G526C     | 0.3556635229172211                 |
| G526W     | 0.11176410635794995                | G526D     | -0.1450505804358385                |

Table S6: Unlikely mutation binding affinity change prediction. Residue ID is according to SARS-CoV-2.

| Mutations | Binding affinity change (kcal/mol) | Mutations | Binding affinity change (kcal/mol) |
|-----------|------------------------------------|-----------|------------------------------------|
| T333Y     | 0.24207507093715092                | T333F     | 0.29634814042280905                |
| T333C     | 0.030545913887769605               | T333W     | 0.3380257088853784                 |
| T333H     | 0.3017683627962638                 | T333D     | 0.29901602918999254                |
| N334W     | 0.21865334474229145                | L335N     | -0.29723300906792643               |
| L335H     | 0.4202664927798433                 | L335D     | -0.2506871042346782                |

Continued on next page



**Table S6 – continued from previous page**

| Mutations | Binding affinity change (kcal/mol) | Mutations | Binding affinity change (kcal/mol) |
|-----------|------------------------------------|-----------|------------------------------------|
| C336K     | -0.21135472415672724               | C336M     | 0.4439400191790419                 |
| C336Q     | -0.40512638908694704               | C336E     | 0.2938299322425579                 |
| P337K     | 0.21662573834688587                | P337M     | 0.16046260933681114                |
| P337W     | 0.06569878428692157                | P337E     | 0.32398654958829837                |
| F338K     | 1.6318666057301372                 | F338Q     | -0.28561167788120234               |
| F338E     | 1.0397023043064877                 | G339K     | 0.33120475427556445                |
| G339M     | 0.3197075588950395                 | G339Q     | 0.3198570745228727                 |
| E340M     | -0.07251237800049302               | E340F     | -0.002504242307229357              |
| E340C     | 0.3153990715147169                 | E340W     | 0.07962545350800865                |
| V341K     | -0.00043742341144481224            | V341W     | -0.21878390871573422               |
| V341Q     | -0.14767817035555747               | F342K     | 3.1158001772756716                 |
| F342Q     | 2.301482828016689                  | F342E     | 1.7607243016951248                 |
| N343W     | 0.1123560161181831                 | A344K     | -0.0694101462313823                |
| A344M     | 0.014360881318925161               | A344W     | -0.17629647411984956               |
| A344Q     | 0.1975648223563149                 | T345W     | 0.1762140139909577                 |
| T345Q     | 0.21824404192929658                | T345E     | 0.23905583556634608                |
| R346Y     | 0.20630900206660238                | R346F     | 0.1916181522809627                 |
| R346H     | 0.8360669536226307                 | R346D     | 0.438923461861072                  |
| F347K     | 1.298207619914493                  | F347Q     | 0.8400625317862286                 |
| F347E     | -0.02876532886695022               | A348N     | -0.1400862335155758                |
| A348M     | 0.08750497165210987                | A348Y     | -0.035518122240894956              |
| A348F     | 0.11403793169418011                | A348C     | 0.21501206935491904                |
| A348W     | 0.40697303163033405                | A348H     | -0.04848679995183082               |
| S349K     | 0.0038340977504157546              | S349M     | 0.25108832423296834                |
| S349Q     | 0.17628323544758986                | S349E     | 0.026155982265649552               |
| V350K     | -0.5751902929353583                | V350W     | -1.2366744959398632                |
| V350Q     | 0.5618845015263113                 | Y351M     | 1.0431508537600183                 |
| A352K     | -0.2863935375504048                | A352M     | -0.08645811555201148               |
| A352W     | -0.004997168005624239              | A352Q     | -0.13145626025349777               |
| W353N     | -0.14538378725989998               | W353I     | -0.03525942957933148               |
| W353H     | -0.4577604638101893                | W353D     | -0.25812219251112273               |
| N354W     | 0.3775881634820072                 | R355Y     | -0.8902931298204833                |
| R355F     | 0.5518232015737332                 | R355H     | 0.10022289932500154                |
| R355D     | -1.0077979655938605                | K356F     | 0.48229266859393116                |
| K356C     | 0.3206594382161754                 | R357Y     | 0.2906016179842271                 |
| R357F     | 0.25956034032687186                | R357H     | 0.42824676785821864                |
| R357D     | 0.13346587124996137                | I358W     | -0.1830424842222454                |
| I358Q     | -0.36489912551325665               | I358E     | 0.14538583295001253                |
| S359Q     | 0.3122845033276875                 | S359E     | 0.16879863775328055                |
| N360W     | 0.13060730963149875                | C361K     | 0.3867335585886608                 |
| C361M     | 0.6214452847414231                 | C361Q     | 0.2562180477728113                 |
| C361E     | 0.17035502136255526                | V362K     | 0.9991545900279177                 |
| V362W     | 0.06858189473708089                | V362Q     | 0.13240683032531814                |
| A363K     | 0.11239212852950922                | A363M     | 0.672567442255831                  |
| A363W     | -1.473215698658069                 | A363Q     | -0.22963764644599527               |
| D364M     | 0.20375645291200745                | D364W     | 0.29129657676807047                |
| Y365M     | 2.7066634520895283                 | S366K     | -1.3181949812591665                |
| S366M     | 0.07747077301760458                | S366Q     | 0.09686696898208265                |
| S366E     | -0.05145393857076869               | V367K     | 0.005226960223673406               |
| V367W     | 2.581421710720353                  | V367Q     | 0.02393461503634065                |

Continued on next page

**Table S6 – continued from previous page**

| Mutations | Binding affinity change (kcal/mol) | Mutations | Binding affinity change (kcal/mol) |
|-----------|------------------------------------|-----------|------------------------------------|
| L368N     | 0.3443397746166931                 | L368Y     | 0.6107188018138878                 |
| L368C     | 2.1174708865170566                 | L368W     | 2.102855756871054                  |
| L368D     | 0.6811373715464464                 | Y369M     | -1.2776338490904036                |
| N370W     | -0.681028825221538                 | S371K     | -0.7201140143279854                |
| S371M     | -0.7694665031288215                | S371Q     | -0.15567538416856677               |
| S371E     | -0.3511460754505119                | A372N     | 0.002349594782218159               |
| A372M     | 0.10579431043422724                | A372Y     | 0.027933933914040532               |
| A372F     | 0.0347458818647869                 | A372C     | -0.026835654269857113              |
| A372W     | 0.041755765026709434               | A372H     | 0.10207757568827311                |
| S373N     | -0.0011554669299099318             | S373M     | -1.1189754621047763                |
| S373H     | -0.2945234012979018                | S373D     | 0.22145311673743912                |
| F374K     | -0.11841108481156774               | F374Q     | 0.30946293724577023                |
| F374E     | 0.26044423064874433                | S375K     | -0.41343206030418783               |
| S375M     | 0.12783139905418875                | S375Q     | 0.19377180329470753                |
| S375E     | 0.03665519312644801                | T376W     | 0.16981841838246647                |
| T376Q     | -1.4216574343082047                | T376E     | -0.07040857945923785               |
| F377K     | -2.0846215708987503                | F377Q     | -0.5511805677960031                |
| F377E     | 0.4512813031473562                 | K378F     | 0.41381586379878554                |
| K378C     | 0.5047492378486751                 | C379K     | 0.11491526683117967                |
| C379M     | 0.2914596117803444                 | C379Q     | 0.06933920822671875                |
| C379E     | 0.1831623432972993                 | Y380M     | 0.5354168768480405                 |
| G381N     | -2.9148885386889605                | G381M     | 0.5292234543708774                 |
| G381Y     | 0.42449415653527156                | G381F     | 0.20130307886963528                |
| G381H     | -1.648143137624976                 | V382N     | 0.16088574312585957                |
| V382Y     | -3.091709526776927                 | V382C     | 0.3778392061475063                 |
| V382H     | 1.0736005323094684                 | S383K     | 0.32338886062898187                |
| S383M     | 0.3459403039492712                 | S383Q     | 0.3710812401346672                 |
| S383E     | 0.22125419784218212                | P384K     | -0.10083589092545062               |
| P384M     | 0.17327724030772126                | P384W     | 0.30281732077468715                |
| P384E     | 0.012398692239318516               | T385W     | 0.17908731999766897                |
| T385Q     | 0.28212972958769145                | T385E     | 0.21889308890053258                |
| K386F     | 0.03732104138170026                | K386C     | 0.057060367781029145               |
| K386W     | 0.08316262096275852                | L387N     | -0.048683153098090605              |
| L387H     | -0.1962728608301724                | L387D     | 0.27803070369952476                |
| N388W     | 0.4734425327996097                 | D389M     | -0.029196803712912018              |
| D389W     | 0.020750402589802618               | L390K     | 0.22321019890509858                |
| L390W     | 0.0934311272444029                 | L390E     | 0.013684139611596063               |
| C391K     | 0.5993537576342104                 | C391M     | 0.5491500181528629                 |
| C391Q     | 0.4472242644098852                 | C391E     | 0.44952700608536855                |
| F392K     | -1.718073185456733                 | F392Q     | -0.23925202335611964               |
| F392E     | 0.33916083256427754                | T393W     | 0.38602137594352987                |
| T393Q     | 0.25447484817557364                | T393E     | 0.09102925982646592                |
| N394W     | -0.578788585392207                 | V395K     | -0.8392053764716583                |
| V395W     | -0.4874999062029869                | V395Q     | -0.5503967356155103                |
| Y396M     | 0.36170200900771937                | A397N     | -0.6486004247553037                |
| A397M     | -0.045996453135712156              | A397Y     | -1.0043539657438878                |
| A397F     | -0.44426997711345156               | A397C     | 0.16598889365892458                |
| A397W     | -0.24644754316747108               | A397H     | -3.718487564037563                 |
| D398M     | -0.07649690331695785               | D398W     | -1.4568151761233261                |
| S399N     | -0.8079321888357283                | S399M     | 0.18697554389553883                |

Continued on next page

Table S6 – continued from previous page

| Mutations | Binding affinity change (kcal/mol) | Mutations | Binding affinity change (kcal/mol) |
|-----------|------------------------------------|-----------|------------------------------------|
| S399H     | -0.15611853346032248               | S399D     | -0.14513677517914475               |
| F400K     | -0.05959352495865624               | F400Q     | 0.26098425948111187                |
| F400E     | 0.25387258806475743                | V401N     | 1.768556625452015                  |
| V401Y     | 2.199939372982614                  | V401C     | 0.1951442755584068                 |
| V401W     | 0.3336469621884698                 | V401H     | -5.042137051565744                 |
| I402W     | 1.5711650012142482                 | I402Q     | -0.4523591971240003                |
| I402E     | -0.034473887330676974              | R403Y     | -2.823195818772567                 |
| R403F     | -3.7418363007154865                | R403H     | 0.26648794568980494                |
| R403D     | 0.8012123688001023                 | G404K     | -0.7949999822060961                |
| G404M     | -0.1522308168135505                | G404Q     | -0.8849638164540204                |
| D405M     | -0.11387547305172363               | D405W     | 2.0695382564353144                 |
| E406M     | -2.3340907741774726                | E406F     | -3.191958257456072                 |
| E406C     | -1.4540917829863647                | E406W     | 0.6290700844936282                 |
| V407K     | 0.19184378089061593                | V407W     | 0.2854860928133522                 |
| V407Q     | -0.3546637179730154                | R408Y     | 0.40449547791516416                |
| R408F     | 0.16364206734468714                | R408H     | 0.48510163176798066                |
| R408D     | 0.7470033426617957                 | Q409M     | 0.6037577433075352                 |
| Q409F     | 0.17804286292218618                | Q409C     | 0.8360986768697284                 |
| Q409W     | -1.51562562911253                  | I410W     | 1.1518169197306456                 |
| I410Q     | -1.0113367198153778                | I410E     | 0.46419781940556437                |
| A411K     | -0.6685235656394444                | A411M     | 0.2944297229906322                 |
| A411W     | 0.551492071811934                  | A411Q     | 0.1498988841877601                 |
| P412N     | 2.095245060506571                  | P412M     | 0.258861001224826                  |
| P412Y     | -0.16246950977197938               | P412F     | 0.03989156351997471                |
| P412C     | 0.03509682006033844                | P412W     | 0.14835711732262843                |
| P412D     | 1.0771722249663758                 | G413N     | 0.2709521610197464                 |
| G413I     | 0.34350779373971907                | G413Y     | 0.25385614154126446                |
| G413F     | 0.2685078630958308                 | G413H     | 0.40160073351002595                |
| Q414M     | 0.2631357738819827                 | Q414F     | 0.1784320844236394                 |
| Q414C     | 0.2954781786185815                 | Q414W     | 0.2251009983672949                 |
| T415W     | 0.016672945569760282               | T415Q     | 0.4987121314198902                 |
| T415E     | 0.25638519043049035                | G416N     | -0.33706531911336485               |
| G416M     | -0.31819222053249785               | G416Y     | -1.2855190455754433                |
| G416F     | -1.2723496296786603                | G416H     | -0.5728769334919663                |
| K417F     | -0.5408881950538802                | K417C     | 2.120132479571659                  |
| I418W     | 3.215994098093014                  | I418Q     | -1.8071548750095652                |
| I418E     | -0.6229716345061209                | A419K     | 1.007420338798919                  |
| A419M     | -0.1772828809449888                | A419W     | -1.300527181364991                 |
| A419Q     | -0.973138390619158                 | D420M     | -2.0120986088604407                |
| D420W     | -1.3016077748636488                | Y421M     | 1.249752832872942                  |
| N422W     | 0.8922630270239766                 | Y423M     | 3.395932946357507                  |
| K424F     | 0.1012641333705591                 | K424C     | 0.16003561282296336                |
| K424W     | -0.33144126002139707               | L425N     | 1.0231247310555203                 |
| L425H     | -0.7288648369193514                | L425D     | -0.4798132983622908                |
| P426N     | -0.369204913543011                 | P426M     | -0.0009256988454088525             |
| P426Y     | -0.04021432620081504               | P426F     | 0.16362463471805377                |
| P426C     | 0.3167031658090848                 | P426W     | -0.17852902729051895               |
| P426D     | -0.16041877199235383               | D427M     | -0.6572888793082845                |
| D427W     | -1.6662453661327106                | D428M     | 0.12904632475332933                |
| D428W     | 0.3526763011960877                 | F429K     | -2.140562210898895                 |

Continued on next page

Table S6 – continued from previous page

| Mutations | Binding affinity change (kcal/mol) | Mutations | Binding affinity change (kcal/mol) |
|-----------|------------------------------------|-----------|------------------------------------|
| F429Q     | -0.2522323118513622                | F429E     | -0.28012482295314395               |
| T430Y     | 0.06585934178081121                | T430F     | -0.0023039597434025227             |
| T430C     | 0.13737679001561215                | T430W     | 0.16306321905005955                |
| T430H     | 0.12755142524198945                | T430D     | -0.21182641996122978               |
| G431K     | -0.7451217307049399                | G431M     | 1.1686106107969958                 |
| G431Q     | 0.40303223963708523                | C432K     | -0.9245793371458035                |
| C432M     | -0.009717122791781817              | C432Q     | -0.46842626547124755               |
| C432E     | 0.3915720030649029                 | V433K     | -0.32969796943843405               |
| V433W     | -2.4064199817369074                | V433Q     | -0.34587879979117486               |
| I434Y     | 0.34314491842311357                | I434C     | 2.6549373726027374                 |
| I434W     | -1.8136731460909161                | I434H     | -0.5625575254825991                |
| I434D     | 0.8578003177067641                 | A435K     | -0.11941504594271952               |
| A435M     | -0.05633270010327772               | A435W     | -2.898899518894752                 |
| A435Q     | -1.9065054034659101                | W436N     | 0.3973466736579986                 |
| W436I     | -1.3742048632314403                | W436H     | 0.042306081479278806               |
| W436D     | 0.3915223714363889                 | N437W     | -0.04550000193971064               |
| S438K     | 0.1449155826586989                 | S438M     | 0.18977155503429982                |
| S438Q     | 0.04450806206034016                | S438E     | -0.07333554866005366               |
| N439W     | -0.04291182896859453               | N440W     | -1.465660949613466                 |
| L441K     | -0.1542478561100039                | L441W     | 0.011952475047604365               |
| L441E     | 0.1409884901324948                 | D442M     | -0.003063243141086876              |
| D442W     | -0.5193392000222161                | S443K     | -0.7945372408890906                |
| S443M     | -2.0677055978357624                | S443Q     | -0.4586181180626743                |
| S443E     | -0.04226086081611559               | K444F     | 1.3058234286797346                 |
| K444C     | 1.7112725972048577                 | V445K     | -0.354148279767807                 |
| V445W     | -1.3578920948690985                | V445Q     | 0.11333478359718643                |
| G446K     | 0.7407444570455642                 | G446M     | -0.6070017155724519                |
| G446Q     | -1.2999051037825993                | G447K     | -1.118365330736824                 |
| G447M     | -0.14669806718563874               | G447Q     | -0.5319300613334905                |
| N448W     | 0.5606963235973238                 | Y449M     | 0.5206613189344319                 |
| N450W     | 0.9258528024036948                 | Y451M     | 0.5545277658647274                 |
| L452N     | 0.8672180998965514                 | L452Y     | 0.5793478303935762                 |
| L452C     | 1.7447191707770586                 | L452D     | 1.4685149809290368                 |
| Y453M     | 1.4072974652468875                 | R454Y     | -1.4493356063199676                |
| R454F     | -0.3534385146437125                | R454H     | -2.0619397129637607                |
| R454D     | -2.124875366363889                 | L455N     | -0.4540899088760951                |
| L455H     | -0.5876689271769696                | L455D     | -0.555754281694056                 |
| F456K     | 0.06618674402869576                | F456Q     | 0.5074489249214893                 |
| F456E     | 0.584824010614921                  | R457Y     | -0.0024188611074833417             |
| R457F     | 0.23067781869270704                | R457H     | -0.0009201855931538931             |
| R457D     | 0.01030193510801925                | K458F     | 0.740645031935683                  |
| K458C     | 0.7183975736078261                 | S459K     | 0.008833388750074719               |
| S459M     | 0.06482150991293753                | S459Q     | -0.1011913574651282                |
| S459E     | 0.12945949235958226                | N460W     | 1.5684332106195555                 |
| L461K     | -0.2642345949933306                | L461W     | -1.3254577506276457                |
| L461E     | -0.22714478837614954               | K462F     | -0.03624938657511821               |
| K462C     | 0.06203607784658856                | K462W     | 0.0017024615229722928              |
| P463K     | -0.17472876233128565               | P463M     | -0.6120223006801093                |
| P463W     | -0.1356076261018299                | P463E     | -0.0861078422962825                |
| F464K     | -2.352936426194467                 | F464Q     | -4.0187890361828655                |

Continued on next page

**Table S6 – continued from previous page**

| Mutations | Binding affinity change (kcal/mol) | Mutations | Binding affinity change (kcal/mol) |
|-----------|------------------------------------|-----------|------------------------------------|
| F464E     | -0.04075405721396566               | E465I     | -0.3026183723863488                |
| E465F     | -0.4274090937352278                | E465C     | 0.19715006930746226                |
| R466Y     | 0.4266868838554445                 | R466F     | 0.4635660867191572                 |
| R466H     | 0.7558857829146377                 | R466D     | 0.20110386852715986                |
| D467M     | -0.1357849152325862                | D467W     | -1.6814272655674884                |
| I468W     | -0.09266281317216996               | I468Q     | -0.13426758481804085               |
| I468E     | 0.15002350788025046                | S469N     | 0.17984055832298043                |
| S469M     | 0.05241214623613184                | S469H     | 0.14766979159393118                |
| S469D     | -0.2971685254994074                | T470W     | -0.06122965235630294               |
| T470Q     | 0.270181532689938                  | T470E     | 0.08949888710170506                |
| E471M     | -0.028829117556518034              | E471F     | -0.037293461971902295              |
| E471C     | 0.26272661138845077                | E471W     | -0.15316024521953076               |
| I472W     | 0.3103352766180671                 | I472Q     | 0.5111473950595167                 |
| I472E     | 0.4122634245564071                 | Y473M     | 0.6086286389292285                 |
| Q474I     | 0.018557972589238685               | Q474F     | -0.5987792141249517                |
| Q474C     | 0.49934316268622503                | A475K     | -0.9279018393646968                |
| A475M     | -2.16206381898927                  | A475W     | -1.019685387800203                 |
| A475Q     | -0.8911061783819667                | G476K     | -0.07687614541617224               |
| G476M     | -0.032558112773395056              | G476Q     | -0.2944884196822526                |
| S477Q     | 0.2614472299192538                 | S477E     | 0.10257821186794377                |
| T478Y     | -0.19769486688965646               | T478F     | -0.7538846244428853                |
| T478C     | 0.312071105872698                  | T478W     | -0.16936895769986343               |
| T478H     | -1.3061614890710582                | T478D     | -0.0281241085339912                |
| P479K     | 0.10771996402796913                | P479M     | -0.022103404897591064              |
| P479W     | 0.25429659886503375                | P479E     | 0.06923953942434599                |
| C480K     | 0.05828259183136162                | C480M     | 0.2207100418288571                 |
| C480Q     | 0.8870505976877652                 | C480E     | 0.20998117023157561                |
| N481W     | -0.34229458476786423               | G482K     | 0.15296926370504896                |
| G482M     | 0.09858967865895407                | G482Q     | 0.14412500187234226                |
| V483K     | 0.01768838818821852                | V483W     | -0.01565639460611414               |
| V483Q     | 0.06513932586760349                | E484M     | 0.8155791234574297                 |
| E484F     | 1.285714967004722                  | E484C     | 1.0516754423560861                 |
| E484W     | 0.05128974661474325                | G485K     | 0.12637181056164298                |
| G485M     | 0.19308008160247317                | G485Q     | 0.2189887426113269                 |
| F486K     | 0.6507039915589268                 | F486Q     | 0.6155350161311833                 |
| F486E     | -0.46884410399225257               | N487W     | -1.6000913458930377                |
| C488K     | 0.13909718958381306                | C488M     | 0.40281166733388546                |
| C488Q     | 0.11370127822407858                | C488E     | 0.26708695185602876                |
| Y489M     | 3.3004062293339964                 | F490K     | 0.2579564577908684                 |
| F490Q     | 2.0338635459056866                 | F490E     | 0.5324832650870002                 |
| P491K     | -0.25154508451639074               | P491M     | 0.004408409466631897               |
| P491W     | -0.31042714281125455               | P491E     | 0.32284156973505984                |
| L492N     | 3.3616003181289456                 | L492H     | 0.04090738322017429                |
| L492D     | 0.9467783716866485                 | Q493M     | 0.7811201070175381                 |
| Q493F     | 0.2831238839475347                 | Q493C     | 2.053140678866535                  |
| Q493W     | 0.7311622631457801                 | S494N     | -0.3816703638276617                |
| S494M     | -0.13730053768164388               | S494H     | 1.0467656008211839                 |
| S494D     | -1.4423320135694575                | Y495M     | 0.20831850216973483                |
| G496K     | -0.6096176327770747                | G496M     | -0.7540319647774985                |
| G496Q     | -0.6140597931088385                | F497K     | 0.37580660918216263                |

Continued on next page

**Table S6 – continued from previous page**

| Mutations | Binding affinity change (kcal/mol) | Mutations | Binding affinity change (kcal/mol) |
|-----------|------------------------------------|-----------|------------------------------------|
| F497Q     | -0.8732056051831719                | F497E     | 1.1547500675563707                 |
| Q498M     | 0.08150204542742172                | Q498F     | -0.21904572321591176               |
| Q498C     | 0.7489095437669969                 | Q498W     | 0.11631277733256506                |
| P499K     | -0.8694701583228355                | P499M     | -0.33500718678542096               |
| P499W     | -0.1384794367948713                | P499E     | 0.16284984549729625                |
| T500W     | -0.7246710186700434                | T500Q     | 1.1425353496163428                 |
| T500E     | 1.075852098342644                  | N501W     | -0.31454939945041993               |
| G502K     | -0.8408206392363077                | G502M     | -0.42402056063435517               |
| G502Q     | 0.10304133158838631                | V503K     | 0.5481848537694747                 |
| V503W     | -0.5996209955785896                | V503Q     | 1.1919699483897959                 |
| G504K     | 0.611201928425668                  | G504M     | -0.2394992939865618                |
| G504Q     | 1.1313894319519153                 | Y505M     | 0.17331897920030664                |
| Q506M     | 0.5914563968709594                 | Q506F     | 1.388550842602894                  |
| Q506C     | 1.0935566733466522                 | Q506W     | -0.46427216007386896               |
| P507N     | 0.31449283606622036                | P507M     | 0.5696266764436271                 |
| P507Y     | -0.4563733509266242                | P507F     | -0.6330467163043908                |
| P507C     | 0.4244122627491029                 | P507W     | -1.0814541332656937                |
| P507D     | 0.13254673484305224                | Y508M     | 0.9050830510980564                 |
| R509Y     | 1.5816262112323218                 | R509F     | 0.17116175324431412                |
| R509H     | 0.0623346248031457                 | R509D     | -2.0198262821923856                |
| V510N     | -0.6427645065341381                | V510Y     | -0.8554819539396187                |
| V510C     | 0.22763786251992232                | V510W     | -0.5334666964127239                |
| V510H     | -0.6495928713526932                | V511N     | -0.7086302639406159                |
| V511Y     | -2.716477570665056                 | V511C     | -1.1356583574983445                |
| V511W     | -3.6837446779025207                | V511H     | -2.009195599076541                 |
| V512N     | -0.592742738150965                 | V512Y     | -1.50881138417807                  |
| V512C     | 1.1799477534866059                 | V512W     | -0.07217208041885595               |
| V512H     | -0.3309716784869912                | L513K     | -0.1547011716492395                |
| L513W     | -0.561287052591257                 | L513E     | 0.16369945258970903                |
| S514K     | 0.09044293914215532                | S514M     | 0.3544249208279361                 |
| S514Q     | -0.04657134211510431               | S514E     | 0.05649932454381871                |
| F515K     | 0.35024643808833483                | F515Q     | 0.017644588943358276               |
| F515E     | 2.1531101465397846                 | E516M     | 1.036404405147896                  |
| E516F     | -0.5427142655154131                | E516C     | 0.04224730575879035                |
| E516W     | -0.39934841058343934               | L517K     | 0.06928065216791865                |
| L517W     | -0.13785979655013209               | L517E     | 0.04102218362040223                |
| L518N     | 0.026910437209509593               | L518Y     | 0.10637568972686924                |
| L518C     | 0.22650370914524215                | L518W     | 0.11664177508341862                |
| L518D     | 0.08919882242899499                | H519M     | 0.09915282026899312                |
| H519W     | 0.2863948598999872                 | A520N     | 0.18495503273730718                |
| A520M     | 0.05065719823240546                | A520Y     | 0.15921486032667398                |
| A520F     | 0.24819171233699314                | A520C     | 0.27574999359145685                |
| A520W     | 0.19873522169670538                | A520H     | 0.2548467049815884                 |
| P521N     | -0.22909261968122854               | P521M     | 0.04425752947635832                |
| P521Y     | -0.03325881571341416               | P521F     | 0.10163317887858055                |
| P521C     | -0.019792645975685884              | P521W     | -0.2153759354532915                |
| P521D     | 0.05618657811915619                | A522N     | 0.13193285395800058                |
| A522M     | 0.16808919863603297                | A522Y     | 0.06161960782774599                |
| A522F     | 0.12224999150958962                | A522C     | -0.005613281483158757              |
| A522W     | 0.1755552589876184                 | A522H     | -0.10147421756897938               |

Continued on next page

**Table S6 – continued from previous page**

| Mutations | Binding affinity change (kcal/mol) | Mutations | Binding affinity change (kcal/mol) |
|-----------|------------------------------------|-----------|------------------------------------|
| T523W     | 0.6883493833454931                 | T523Q     | 0.5171701632837328                 |
| T523E     | 0.3967537692508082                 | V524K     | -0.194263147687278                 |
| V524W     | 1.7778879695520378                 | V524Q     | 2.1571939321157294                 |
| C525K     | 0.5660980277107361                 | C525M     | 0.5484441215930687                 |
| C525Q     | 0.20979048088137295                | C525E     | -0.8606766422395253                |
| G526N     | -0.3795088904034186                | G526M     | 0.26280584146539504                |
| G526Y     | -0.46570857018616                  | G526F     | -0.5720850563953427                |
| G526H     | -0.0606342823660725                |           |                                    |

### S2.3 Predicted BA changes for all mutations from SARS-CoV to SARS-CoV-2.

Table S7: Binding affinity prediction from SARS-CoV to SARS-CoV-2. Residue ID is according to SARS-CoV.

| Mutations | Binding affinity change (kcal/mol) | Mutations | Binding affinity change (kcal/mol) |
|-----------|------------------------------------|-----------|------------------------------------|
| K333R     | -0.10359754921303413               | P335A     | 0.3212151191179889                 |
| E341N     | 0.8368514240314354                 | K344R     | 0.11465686826831675                |
| T359A     | 0.20748319448197822                | F360S     | 0.3562795571703173                 |
| A371P     | 0.32441540521635565                | V389I     | -0.2031424443319469                |
| K390R     | -1.7441591796657139                | D393E     | -0.9896440375025348                |
| V404K     | -0.20714869387450055               | M417T     | -0.10962104369517127               |
| L421I     | -0.20029693545802285               | T425S     | 0.7664401607840219                 |
| R426N     | 0.01476290825847672                | I428L     | -0.15641518978554975               |
| A430S     | -0.20596618588966087               | T431K     | 0.022688505030826214               |
| S432V     | -0.09515241606390148               | T433G     | 0.4853718082937637                 |
| K439L     | -0.28177774792466864               | Y442L     | 1.1037522663565902                 |
| L443F     | -0.5273288533377353                | H445K     | -0.32283081058973695               |
| G446S     | 0.21609722530913525                | K447N     | 0.1937550325988337                 |
| R449K     | 0.2864687750191611                 | N457T     | 0.17052040315666897                |
| V458E     | 0.3860490583680413                 | P459I     | 0.03158425269684419                |
| F460Y     | 0.2651433886946123                 | S461Q     | -0.0432150026616928                |
| P462A     | 0.3716844862211602                 | D463G     | 0.5908664315789177                 |
| G464S     | 0.21082880440230464                | K465T     | 0.3194566314728193                 |
| T468N     | 0.2206752545345611                 | P469G     | 0.2553950194573119                 |
| P471E     | 0.32119888251323336                | A472G     | 0.5768583617503635                 |
| L473F     | 0.43415144307791714                | W477F     | 0.11116224994963846                |
| N480Q     | 0.23735507010135506                | D481S     | 1.6343732194606992                 |
| Y485Q     | 0.0738761940317186                 | T486P     | -1.467504027152281                 |
| T488N     | -1.0281989412820935                | I490V     | 0.026002567283284355               |

## References

- [1] Z. Cang, L. Mu, and G.-W. Wei. Representability of algebraic topology for biomolecules in machine learning based scoring and virtual screening. *PLoS computational biology*, 14(1):e1005929, 2018.
- [2] G. Carlsson. Topology and data. *Bulletin of the American Mathematical Society*, 46(2):255–308, 2009.

- [3] H. Edelsbrunner, D. Letscher, and A. Zomorodian. Topological persistence and simplification. In *Proceedings 41st annual symposium on foundations of computer science*, pages 454–463. IEEE, 2000.
- [4] J. Jankauskaitė, B. Jiménez-García, J. Dapkūnas, J. Fernández-Recio, and I. H. Moal. Skempi 2.0: an updated benchmark of changes in protein–protein binding energy, kinetics and thermodynamics upon mutation. *Bioinformatics*, 35(3):462–469, 2019.
- [5] F. Pedregosa, G. Varoquaux, A. Gramfort, V. Michel, B. Thirion, O. Grisel, M. Blondel, P. Prettenhofer, R. Weiss, V. Dubourg, et al. Scikit-learn: Machine learning in python. *the Journal of machine Learning research*, 12:2825–2830, 2011.
- [6] C. H. Rodrigues, Y. Myung, D. E. Pires, and D. B. Ascher. mcsm-ppi2: predicting the effects of mutations on protein–protein interactions. *Nucleic acids research*, 47(W1):W338–W344, 2019.
- [7] M. Wang, Z. Cang, and G.-W. Wei. A topology-based network tree for the prediction of protein–protein binding affinity changes following mutation. *Nature Machine Intelligence*, 2(2):116–123, 2020.
- [8] N. Zhang, Y. Chen, H. Lu, F. Zhao, R. V. Alvarez, A. Goncarenco, A. R. Panchenko, and M. Li. Mutabind2: predicting the impacts of single and multiple mutations on protein-protein interactions. *Iscience*, page 100939, 2020.
